# Supplementary material for: Short Antimicrobial Peptide Derived from the Venom Gland Transcriptome of Pamphobeteus verdolaga Increases Gentamicin Susceptibility of Multidrug-Resistant Klebsiella pneumoniae
Source: MDPI journal article supplement (doi:10.3390/antibiotics13010006), 2023-12-20
Supplement: s1 [file s1]

# Short Antimicrobial Peptide Derived from the Venom Gland Transcriptome of *Pamphobeteus verdolaga* Increases Gentamicin Susceptibility of Multidrug-Resistant *Klebsiella pneumoniae*

Cristian Salinas-Restrepo <sup>1</sup>, Ana María Naranjo-Duran <sup>1</sup>, Juan Quintana <sup>2</sup>, Julio Bueno <sup>3</sup>, Fanny Guzman <sup>4</sup>, Lina M. Hoyos Palacio <sup>5</sup> and Cesar Segura <sup>6,\*</sup>

<sup>1</sup> Grupo Toxinología, Alternativas Terapéuticas y Alimentarias, Facultad de Ciencias Farmacéuticas y Alimentarias, Universidad de Antioquia, Medellín 050012, Colombia; cristian.salinas@udea.edu.co (C.S.-R.); amaria.naranjo@udea.edu.co (A.M.N.-D.)

<sup>2</sup> Facultad de Medicina, Universidad Cooperativa de Colombia, Medellín 050012, Colombia; juan.quintana@ucc.edu.co

<sup>3</sup> Grupo Reproducción, Facultad de Medicina, Universidad de Antioquia, Medellín 050012, Colombia; julio.bueno@udea.edu.co

<sup>4</sup> Núcleo Biotecnología Curauma (NBC), Pontificia Universidad Católica de Valparaíso, Valparaíso 3100000, Chile; fanny.guzman@pucv.cl

<sup>5</sup> Escuela de Ciencias de la Salud, Grupo de Investigación Biología de Sistemas, Universidad Pontificia Bolivariana, Medellín 050031, Colombia; lina.hoyos@upb.edu.co

<sup>6</sup> Grupo Malaria, Facultad de Medicina, Universidad de Antioquia, Medellín 050012, Colombia

\* Correspondence: cesar.segura@udea.edu.co

**Table S1.** Custom database (cDB) of arthropod antimicrobial peptides.

| Peptide                        | Species                        | Sequence            | # aa | Charge (+) | MIC <i>E. coli</i> (μM) | MIC <i>S. aureus</i> (μM) |
|--------------------------------|--------------------------------|---------------------|------|------------|-------------------------|---------------------------|
| AaeAP1                         | <i>Androctonus aeneas</i>      | FLFSLIPSVIAGLVSAIRN | 19   | 1          |                         | 11.90                     |
| AaeAP1 [S4.8.15K; A11K. N19K]  | <i>Androctonus aeneas</i>      | FLFKLIPKVIKGLVKAIRK | 19   | 6          | 10.85                   | 8.14                      |
| AaeAP2                         | <i>Androctonus aeneas</i>      | FLFSLIPSAIAGLVSAIRN | 19   | 1          |                         | 8.04                      |
| AaeAP2 [S4.8.15K; A11K. N19K]  | <i>Androctonus aeneas</i>      | FLFKLIPKAIKGLVKAIRK | 19   | 6          | 10.99                   | 8.24                      |
| AamAP1 [S4K.H8K.G11.12 K.A16K] | <i>Androctonus amoreuxi</i>    | FLFKLIPKAIKKLISKFK  | 18   | 6          | 7.50                    | 5.00                      |
| AamAP1 [H8K]                   | <i>Androctonus amoreuxi</i>    | FLFSLIPKAIGGLISAFK  | 18   | 2          | 5.00                    | 3.00                      |
| AcrAP1                         | <i>Androctonus crassicauda</i> | FLFSLIPHAISGLISAFK  | 18   | 1          |                         | 8.00                      |
| AcrAP1a                        | <i>Androctonus crassicauda</i> | FLFKLIPKAIKGLIKAFK  | 18   | 6          | 4                       | 8                         |
| AcrAP1a [S4K.H8K.S11K.S15K]    | <i>Androctonus crassicauda</i> | FLFKLIPKAIKGLIKAFK  | 18   | 5          | 8.00                    | 4.00                      |
| AcrAP2                         | <i>Androctonus crassicauda</i> | FLFSLIPNAISGLLSAFK  | 18   | 1          |                         | 8.00                      |

|                                   |                                               |                                         |    |   |       |       |
|-----------------------------------|-----------------------------------------------|-----------------------------------------|----|---|-------|-------|
| AcrAP2<br>[S4K.N8K.S11K.S<br>15K] | <i>Androctonus<br/>crassicauda</i>            | FLFKLIPKAIKGLLKAFK                      | 18 | 5 | 8.00  | 4.00  |
| Agelaia-CP                        | <i>Agelaia pallipes</i>                       | ILGTILGLLKGL                            | 12 | 1 |       | 12.00 |
| Androctonin                       | <i>Androctonus<br/>australis</i>              | RSVCRQIKICRRRGGCYYKCTNRPY               | 25 | 8 | 12.00 |       |
| Apidaecin-1A                      | <i>Apis mellifera</i>                         | GNNRPVYIPQRPHPHR                        | 17 | 3 | 11.71 |       |
| Apidaecin-1B                      | <i>Apis mellifera</i>                         | GNNRPVYIPQRPHPHRL                       | 18 | 3 | 0.32  |       |
| Apidaecin-2                       | <i>Apis mellifera</i>                         | GNNRPYIPQRPHPHRL                        | 18 | 3 | 0.09  |       |
| Bicarinalin                       | <i>Tetramorium<br/>bicarinatum</i>            | KIKIPWGVKVDLVLGGMKAV                    | 20 | 4 |       | 10.45 |
| BmKn1                             | <i>Mesobuthus<br/>martensii</i>               | FIGAVAGLLSKIF                           | 13 | 1 |       | 14.97 |
| Bmkn2                             | <i>Mesobuthus<br/>martensii</i>               | FIGAIARLLSKIFGKR                        | 16 | 4 | 1.50  | 0.60  |
| BmKn2OR                           | <i>Mesobuthus<br/>martensii</i>               | FIGAIARLLSKIF                           | 13 | 2 |       | 5.49  |
| cGomesin                          | <i>Acanthoscurria<br/>gomesiana</i>           | GCRRLCYQRCVITYCRGR                      | 18 | 6 | 2.03  |       |
| Codesane                          | <i>Colletes<br/>daviesanus</i>                | GMASLLAKVLPVVKLIK                       | 18 | 3 | 3.70  | 3.70  |
| Css54                             | <i>Centruroides<br/>suffusus<br/>suffusus</i> | FFGSLLSLGSKLLPSVFKLFQRKKE               | 25 | 4 | 4.35  | 4.35  |
| Ctriporin                         | <i>Chaerilus<br/>tricostatus</i>              | FLWGLIPGAISAVTSLIKK                     | 19 | 2 |       | 4.34  |
| Cupiennin-1d                      | <i>Cupiennius salei</i>                       | GFGSLFKFLAKKVAKTVAKQAAKQGAKYVANK<br>HME | 35 | 7 | 0.12  | 0.94  |
| Cupiennin-2a                      | <i>Cupiennius salei</i>                       | GFGTILKALAKIAGKVVKLATKPGATYMLKENL<br>K  | 35 | 7 | 0.16  | 0.16  |
| Defensin-1                        | <i>Centruroides<br/>limpidus<br/>limpidus</i> | ACQFWSCNSSCISRGYRQGYCWGIQYKYCQCQ        | 32 | 3 | 13.08 | 13.08 |
| Delta-Myrtoxin-<br>Mp1a           | <i>Myrmecia<br/>pilosula</i>                  | IDWKKVDWKKVSKKTCKVMLKACKFLG             | 27 | 7 |       | 4.80  |
| Dominulin-A                       | <i>Polistes<br/>dominula</i>                  | INWKKIAEVGGKILSSL                       | 17 | 2 | 4.31  |       |
| Dominulin-B                       | <i>Polistes<br/>dominula</i>                  | INWKKIAEIGKQVLSAL                       | 17 | 2 | 4.19  |       |
| Eumenine<br>mastoparan-AF         | <i>Anterhynchium<br/>flavomarginatu<br/>m</i> | INLLKIAKGIIKSL                          | 14 | 3 | 13.12 | 3.28  |
| Eumenitin                         | <i>Eumenes<br/>rubronotatus</i>               | LNLKGIFKKVASLLT                         | 15 | 3 | 6.00  |       |
| Gomesin                           | <i>Acanthoscurria<br/>gomesiana</i>           | CRRRLCYQRCVITYCRGR                      | 17 | 6 | 0.80  | 12.10 |
| Gomesin (4-18)<br>[Q9p]           | <i>Acanthoscurria<br/>gomesiana</i>           | RLTYKPRTVTYTRGR                         | 15 | 5 | 10.24 |       |
| Gomesin c(1-<br>18)[Gln1]         | <i>Acanthoscurria<br/>gomesiana</i>           | QCRRLCYQRCVITYCRGR                      | 18 | 6 | 0.48  | 1.44  |
| H/V-peptide (1-<br>11)(19-25)     | <i>Hadrurus<br/>aztecus</i>                   | GILKTIKSIASKLKRKAK                      | 18 | 7 | 9.37  |       |
| H/V-peptide (1-<br>28)            | <i>Vaejovis<br/>mexicanus<br/>smithi</i>      | GILKTIKSIASKVANTVQKLKRKAKNAV            | 28 | 8 | 1.20  |       |
| HAL-1                             | <i>Halictus<br/>sexcinctus</i>                | GMWSKILGHLIR                            | 12 | 2 | 3.80  | 7.70  |

|           |                              |                          |    |   |      |       |
|-----------|------------------------------|--------------------------|----|---|------|-------|
| HAL-1/10  | <i>Halictus sexcinctus</i>   | GMWKKILGKLIR             | 12 | 4 | 2.30 | 15    |
| HAL-1/15  | <i>Halictus sexcinctus</i>   | GMWSKLLGHLLR             | 12 | 2 | 3.00 | 7.70  |
| HAL-1/18  | <i>Halictus sexcinctus</i>   | GMWSKILKHLIR             | 12 | 3 | 2.30 | 3.70  |
| HAL-1/19  | <i>Halictus sexcinctus</i>   | GKWKKILGHLIR             | 12 | 4 | 2.70 |       |
| HAL-1/20  | <i>Halictus sexcinctus</i>   | GKWSKILGKLIR             | 12 | 4 | 2.30 |       |
| HAL-1/21  | <i>Halictus sexcinctus</i>   | GKWKKILGKLIR             | 12 | 5 | 1.80 |       |
| HAL-1/26  | <i>Halictus sexcinctus</i>   | GMWSKILGHLI              | 11 | 1 | 7.00 |       |
| HAL-1/5   | <i>Halictus sexcinctus</i>   | GMWKKILGHLIR             | 12 | 3 | 1.80 | 8.40  |
| HAL-1/6   | <i>Halictus sexcinctus</i>   | GMWSKILGHLIK             | 12 | 2 | 7.20 |       |
| HAL-1/9   | <i>Halictus sexcinctus</i>   | GMWSKILGKLIR             | 12 | 3 | 3.70 | 9.20  |
| HAL-2     | <i>Halictus sexcinctus</i>   | GKWMSLLKHILK             | 12 | 3 | 2.50 | 8.10  |
| HAL-2/1   | <i>Halictus sexcinctus</i>   | GKWKSLLKHILK             | 12 | 4 | 3.70 |       |
| HAL-2/10  | <i>Halictus sexcinctus</i>   | GKWWSLLKHILK             | 12 | 3 | 1.60 | 4.70  |
| HAL-2/11  | <i>Halictus sexcinctus</i>   | GKWLSLLKHILK             | 12 | 3 | 1.80 | 5.50  |
| HAL-2/12  | <i>Halictus sexcinctus</i>   | GKWMHLLKHILK             | 12 | 3 | 3.70 | 12.50 |
| HAL-2/13  | <i>Halictus sexcinctus</i>   | GKWMTLLKHILK             | 12 | 3 | 2.70 | 5.30  |
| HAL-2/14  | <i>Halictus sexcinctus</i>   | GKWMSLLKQILK             | 12 | 3 | 2.50 | 10.80 |
| HAL-2/16  | <i>Halictus sexcinctus</i>   | SKWMSLLKHILK             | 12 | 3 | 2.30 | 9.20  |
| HAL-2/17  | <i>Halictus sexcinctus</i>   | HKWMSLLKHILK             | 12 | 3 | 3.50 |       |
| HAL-2/2   | <i>Halictus sexcinctus</i>   | GKWMKLLKHILK             | 12 | 4 | 2.50 | 4.50  |
| HAL-2/20  | <i>Halictus sexcinctus</i>   | GKWMSLWKHILK             | 12 | 3 | 8.00 |       |
| HAL-2/21  | <i>Halictus sexcinctus</i>   | GKWMSWLKHILK             | 12 | 3 | 3.90 | 10.10 |
| HAL-2/24  | <i>Halictus sexcinctus</i>   | GKFMSLLKHILK             | 12 | 3 | 5.80 |       |
| HAL-2/4   | <i>Halictus sexcinctus</i>   | GKWMSLLKKILK             | 12 | 4 | 2.70 | 6.30  |
| HAL-2/5   | <i>Halictus sexcinctus</i>   | KKWMSLLKHILK             | 12 | 4 | 6.30 |       |
| HAL-2/6   | <i>Halictus sexcinctus</i>   | GKWMSFLKHILK             | 12 | 3 | 4.00 | 6.40  |
| HAL-2/9   | <i>Halictus sexcinctus</i>   | GKWQSLLKHILK             | 12 | 3 | 8.00 |       |
| Heterin 2 | <i>Heterometrus spinifer</i> | FWGALAKGALKLIPSLVSSFTKGD | 24 | 3 |      | 5.60  |
| Hp1090    | <i>Heterometrus petersii</i> | FKAIWSGIKSLF             | 12 | 2 | 15   |       |
| Hp1404    | <i>Heterometrus petersii</i> | GILGKLWEGVKSIF           | 14 | 1 |      | 8.75  |

|                       |                                        |                             |    |    |       |       |
|-----------------------|----------------------------------------|-----------------------------|----|----|-------|-------|
| HYL                   | <i>Hylaeus signatus</i>                | GIMSSLMKKLAASHIAK           | 16 | 3  | 15    |       |
| Im-5                  | <i>Isometrus maculatus</i>             | FLGSLFSIGSKLLPGVIKLFQRKKQ   | 25 | 5  | 10.00 | 3.75  |
| IsCT                  | <i>Opisthacanthus madagascariensis</i> | ILGKIWEGIKSLF               | 13 | 1  | 4.00  | 1.25  |
| IsCT [EK7. GP8. SK11] | <i>Opisthacanthus madagascariensis</i> | ILGKIWKPIKKLF               | 13 | 4  | 2.00  | 1.17  |
| IsCT [EK7]            | <i>Opisthacanthus madagascariensis</i> | ILGKIWKGIKSLF               | 13 | 3  | 2.00  | 1.00  |
| IsCT [WL6. SK11]      | <i>Opisthacanthus madagascariensis</i> | ILGKILKGIKKLF               | 13 | 4  | 2.00  | 2.00  |
| IsCT [WL6]            | <i>Opisthacanthus madagascariensis</i> | ILGKILEGIKSLF               | 13 | 1  |       | 4.00  |
| IsCT precursor        | <i>Opisthacanthus madagascariensis</i> | ILGKIWKIKKLF                | 12 | 4  | 2.00  | 2.00  |
| IsCT-P                | <i>Opisthacanthus madagascariensis</i> | ILKKIWKPIKKLF               | 13 | 5  | 2.00  | 1.00  |
| Ixosin                | <i>Ixodes sinensis</i>                 | GLHKVMREVLGYERNSYKKFFLR     | 23 | 4  | 10.45 | 1.29  |
| Jellein-1             | <i>Apis mellifera</i>                  | PFKLSLHL                    | 8  | 1  | 2.62  | 10.48 |
| Jellein-2             | <i>Apis mellifera</i>                  | TPFKLSLHL                   | 9  | 1  | 14.21 |       |
| Lacrain               | <i>Scolopendra viridicornis</i>        | RYPAVGYT                    | 8  | 1  | 5.80  |       |
| Lasiocepsin           | <i>Lasioglossum laticeps</i>           | GLPRKILCAIAKKKGKCKGPLKLVCCK | 27 | 9  | 3.00  |       |
| Lasioglossin LL-I     | <i>Lasioglossum laticeps</i>           | VNWKVVLGKIIKVAK             | 15 | 5  | 1.70  | 14.3  |
| Lasioglossin LL-II    | <i>Lasioglossum laticeps</i>           | VNWKILGKIIKVAK              | 15 | 5  | 1.40  | 9.00  |
| Lasioglossin LL-III   | <i>Lasioglossum laticeps</i>           | VNWKILGKIIKVVK              | 15 | 5  | 1.40  | 3.90  |
| Latarcin-1            | <i>Lachesana tarabaei</i>              | SMWSGMWRRKLKLRNALKKKLKGEK   | 26 | 10 | 0.85  |       |
| Latarcin-2a           | <i>Lachesana tarabaei</i>              | GLFGKLIKFGKRAISYAVKKARGKN   | 26 | 10 | 0.7   |       |
| Latarcin-3a           | <i>Lachesana tarabaei</i>              | SWKSMAKKLKEYMEKLKQRA        | 21 | 5  | 4.25  |       |
| Latarcin-4a           | <i>Lachesana tarabaei</i>              | GLKDKFKSMGEKLKQYIQTWKAKF    | 25 | 5  | 3.85  |       |
| Latarcin-4b           | <i>Lachesana tarabaei</i>              | SLKDKVKSMGEKLKQYIQTWKAKF    | 24 | 5  | 4.40  |       |
| Latarcin-5            | <i>Lachesana tarabaei</i>              | GFFGKMKEYFKKFGASFRRFANLKKRL | 28 | 9  | 0.60  | 0.70  |
| Longicin (53-73)      | <i>Haemaphysalis longicornis</i>       | SIGRRGGYCAGIHKQTCTCYR       | 21 | 4  | 2.00  | 2.00  |
| Lycocitin-1           | <i>Lycosa singoriensis</i>             | GKLQAFIAKMEIAAQTL           | 19 | 2  | 4.80  |       |
| Lycocitin-2           | <i>Lycosa singoriensis</i>             | GRLQAFIAKMEIAAQTL           | 18 | 2  | 4.70  |       |
| Lycosin-I             | <i>Lycosa singoriensis</i>             | RKGWFKAMKSIKFIKKEKLKEHL     | 24 | 6  |       | 7.80  |

|                             |                                   |                                     |    |   |       |       |
|-----------------------------|-----------------------------------|-------------------------------------|----|---|-------|-------|
| Lycosin-II                  | <i>Lycosa singoriensis</i>        | VWLSALKFIGKHLAKHQLSKL               | 21 | 4 | 12.50 | 3.10  |
| M-ctenitoxin-Cs1a           | <i>Cupiennius salei</i>           | GFGALFKFLAKKVAKTVAKQAAKQGAKYVVNKQME | 35 | 7 | 0.47  | 0.47  |
| M-lycotoxin-Hc1a            | <i>Hogna carolinensis</i>         | IWLTALKFLGKHAACHHLAKQQLSKL          | 26 | 5 | 15    |       |
| M-theraphotoxin-Gr1a        | <i>Grammostola rosea</i>          | GCLEFWWKCNPNDKCCRPKLKCSKLFKLCNFSF   | 34 | 4 | 12.00 | 3.00  |
| Macropin 1                  | <i>Macropis fulvipes</i>          | GFGMALKLLKKVL                       | 13 | 3 | 3.00  | 3.70  |
| Marmelittin                 | <i>Mesobuthus martensii</i>       | FLFSLIPSAISGLISAFKGRR               | 21 | 3 | 6.21  | 6.48  |
| Mastoparan B                | <i>Vespa basalis</i>              | LKLKSIVSWAKKVL                      | 14 | 4 |       | 8.89  |
| Mastoparan MP               | <i>Mischocyttarus phthisicus</i>  | INWLKLGKKMMSAL                      | 14 | 3 |       | 9.00  |
| Mastoparan PDD-A            | <i>Polistes dorsalis dorsalis</i> | INWKKIFEKVKNLV                      | 14 | 3 | 5.62  | 11.80 |
| Mastoparan PMM              | <i>Polistes major major</i>       | INWKKIASIGKEVLKAL                   | 17 | 3 | 4.93  |       |
| Mastoparan-A                | <i>Vespa analis</i>               | IKWKAILDAVKKVI                      | 14 | 3 | 4.92  |       |
| Mastoparan-AF               | <i>Vespa magnifica</i>            | INLKAIAALAKKLF                      | 14 | 3 | 3.96  |       |
| Mastoparan-L                | <i>Vespa tropica</i>              | INLKALAALAKKIL                      | 14 | 3 |       | 14.6  |
| Mastoparan-like peptide 12b | <i>Vespa magnifica</i>            | INWKGIAAMKKLL                       | 13 | 3 | 10.09 | 2.49  |
| Mastoparan-like peptide 12c | <i>Vespa magnifica</i>            | INLKAIAALAKKLLG                     | 15 | 3 | 3.90  | 1.95  |
| Mastoparan-like peptide 12d | <i>Vespa magnifica</i>            | INLKAIAAMAKKLL                      | 14 | 3 | 2.00  | 1.00  |
| Mastoparan-M                | <i>Vespa magnifica</i>            | INLKAIAALAKKLL                      | 14 | 3 | 5.41  |       |
| Mastoparan-T                | <i>Vespa tropica</i>              | INLKAIAAFACKLL                      | 14 | 3 | 5.28  |       |
| Mastoparan-V                | <i>Vespa magnifica</i>            | INWKGIAAMAKKLL                      | 14 | 3 | 5.13  |       |
| Mastoparan-VT2              | <i>Vespa tropica</i>              | NLKAIAALAKKLL                       | 13 | 3 | 10.06 | 5.49  |
| Mastoparan-VT3              | <i>Vespa tropica</i>              | INLKAITALAKKLL                      | 14 | 3 |       | 3.86  |
| Mastoparan-VT7              | <i>Vespa tropica</i>              | INLKAIAALARNY                       | 13 | 2 |       | 13.98 |
| Melectin                    | <i>Melecta albifrons</i>          | GFLSILKKVLPKVMAMHK                  | 18 | 4 | 10.37 | 12.80 |
| Melittin                    | <i>Apis florea</i>                | GIGAILKVLATGLPTLISWIKNRKQ           | 26 | 5 | 0.60  | 0.60  |
| Melittin                    | <i>Apis mellifera</i>             | GIGAVLKVLTTGLPALISWIKRKRQQ          | 26 | 5 | 2.72  | 2.78  |
| Meucin-13                   | <i>Mesobuthus eupeus</i>          | IFGAIAGLLKNIF                       | 13 | 1 | 7.90  | 8.89  |
| Meucin-18                   | <i>Mesobuthus eupeus</i>          | FFGHLFKLATKIIPSLFQ                  | 18 | 2 | 12.56 | 4.29  |
| Midgut defensin G2          | <i>Haemaphysalis longicornis</i>  | ACHAHCQSVGRRGGYCGNFRMTCYCY          | 26 | 3 | 5.94  | 5.09  |
| MP-VB1                      | <i>Vespa bicolor</i>              | INMKASAAYAKKLL                      | 14 | 3 |       | 2.15  |
| Mucroporin                  | <i>Lychas mucronatus</i>          | LFGLIPSLIGGLVSAFK                   | 17 | 1 |       | 14.43 |
| OcyC1                       | <i>Urodacus yaschenkoi</i>        | ILSAIWSGIKSLF                       | 13 | 1 |       | 6.50  |
| OsDef2 (16-37)              | <i>Ornithodoros savignyi</i>      | KGIRGYKGGYCKGAFKQTCKCY              | 22 | 6 |       | 6.10  |

|                              |                              |                                      |    |    |       |       |
|------------------------------|------------------------------|--------------------------------------|----|----|-------|-------|
| OsDef2 (16-37)[C26.34.36Del] | <i>Ornithodoros savignyi</i> | KGIRGYKGGYKGAFKQTKY                  | 19 | 6  |       | 6.98  |
| Osmin                        | <i>Osmia rufa</i>            | GFLSALKKYLPVLKHV                     | 17 | 3  | 1.56  |       |
| OxTx1                        | <i>Oxyopes takobius</i>      | KFKWGKLFSTAKKLYKKGGKLSKNKNFKKALKF GK | 35 | 15 | 0.19  | 0.93  |
| Oxyopinin-4a                 | <i>Oxyopes takobius</i>      | GIRCPKSWKCKAFKQRVLKRLAMLRLQHAF       | 31 | 9  | 0.50  | 10.00 |
| Pandinin-2                   | <i>Pandinus imperator</i>    | FWGALAKGALKLIPSLFSSFSKKD             | 24 | 3  |       | 12.34 |
| Pandinin-2 [P14G]            | <i>Pandinus imperator</i>    | FWGALAKGALKLIGSLFSSFSKKD             | 24 | 3  | 12.50 | 12.50 |
| Pantinin-1                   | <i>Pandinus imperator</i>    | GILGKLWEGFKSIV                       | 14 | 1  |       | 11.00 |
| Pantinin-3                   | <i>Pandinus imperator</i>    | FLSTIWNGIKSLL                        | 13 | 1  |       | 14    |
| Parapolybia Mastoparan       | <i>Parapolybia indica</i>    | INWKKMAATAALKMI                      | 14 | 3  | 2.41  | 1.79  |
| Pepcon                       | <i>Androctonus amoreuxi</i>  | FLFSLIPSAIGGLISAFK                   | 18 | 1  |       | 5.00  |
| Peptide BmKb1                | <i>Mesobuthus martensii</i>  | FLFSLIPSAISGLISAFK                   | 18 | 1  |       | 7.27  |
| Pilosulin-1 (1-20)           | <i>Myrmecia pilosula</i>     | GLGSVFGRLARILGRVIPKV                 | 20 | 4  | 3.33  | 2.50  |
| Pilosulin-2                  | <i>Myrmecia pilosula</i>     | GLLSKFGRLARKLARVIPKV                 | 20 | 6  | 1.33  | 4.00  |
| PNG-1                        | <i>Panurgus calcaratus</i>   | LNWGAILKHHIK                         | 12 | 2  | 3.70  | 10.60 |
| PNG-1/1                      | <i>Panurgus calcaratus</i>   | NLWAGILKHHIK                         | 12 | 2  | 12.50 |       |
| PNG-1/12                     | <i>Panurgus calcaratus</i>   | KNWGKILKHHIK                         | 12 | 4  | 11.30 |       |
| PNG-1/13                     | <i>Panurgus calcaratus</i>   | KNWKAILKHHIK                         | 12 | 4  | 7.80  |       |
| PNG-1/17                     | <i>Panurgus calcaratus</i>   | LNWGAFLKHFFK                         | 12 | 2  | 5.00  |       |
| PNG-1/19                     | <i>Panurgus calcaratus</i>   | LNWGALLKHLLK                         | 12 | 2  | 3.80  | 6.70  |
| PNG-1/22                     | <i>Panurgus calcaratus</i>   | LNWGAWLKHWWK                         | 12 | 2  | 7.20  |       |
| PNG-1/3                      | <i>Panurgus calcaratus</i>   | LKWGAILKHHIK                         | 12 | 3  | 3.70  | 11.70 |
| PNG-1/5                      | <i>Panurgus calcaratus</i>   | LNWKAILKHHIK                         | 12 | 3  | 2.30  | 5.30  |
| PNG-1/6                      | <i>Panurgus calcaratus</i>   | LNWGKILKHHIK                         | 12 | 3  | 4.00  | 8.70  |
| PNG-1/9                      | <i>Panurgus calcaratus</i>   | LNWGAILKKIHK                         | 12 | 3  | 4.30  | 7.30  |
| Polybia-CP                   | <i>Polybia paulista</i>      | ILGTILGLLKSLL                        | 12 | 1  |       | 4.00  |
| Polybia-MP-II                | <i>Polybia paulista</i>      | INWLKLGKMVIDAL                       | 14 | 1  | 4.96  | 2.36  |
| Polyphemusin-2               | <i>Limulus polyphemus</i>    | RRWCFRVCYKGFCYRKCR                   | 18 | 8  | 3.87  | 5.14  |
| Polyphemusin-1               | <i>Limulus polyphemus</i>    | RRWCFRVCYRGFCYRKCR                   | 18 | 8  | 0.9   | 0.3   |
| Ponericin-G1                 | <i>Pachycondyla goeldii</i>  | GWKDWAKKAGGWLKKKGPGMAKAALKAAAMQ      | 30 | 7  |       | 8.00  |
| Ponericin-W1                 | <i>Pachycondyla goeldii</i>  | WLGSALKIGAKLLPSVVGLFKKKKQ            | 25 | 6  |       | 8.00  |

|                             |                                         |                             |    |   |       |       |
|-----------------------------|-----------------------------------------|-----------------------------|----|---|-------|-------|
| Ponericin-W4                | <i>Pachycondyla goeldii</i>             | GIWGTALKWGVKLLPKLVGMAQTKKQ  | 26 | 5 | 7.25  | 12.50 |
| Protonectarina Mastoparan   | <i>Protonectarina sylveirae</i>         | INWKALLDAAKKVL              | 14 | 2 | 4.93  | 2.46  |
| Salivary glands defensin S2 | <i>Haemaphysalis longicornis</i>        | NCIQQCVSCKGAQGGYCTNEKCTCY   | 24 | 1 | 6.73  | 5.76  |
| Scolopendin 2               | <i>Scolopendra subspinipes mutilans</i> | AGLQFPVGRIGRLLRK            | 16 | 4 | 6.30  |       |
| Scolopin 1                  | <i>Scolopendra mutilans</i>             | FLPKMSTKL RVPYRRGTKDYH      | 21 | 5 | 5.30  | 1.20  |
| Scolopin 2                  | <i>Scolopendra mutilans</i>             | GILKKFMLHRG TKVYKMRTL SKRSH | 25 | 8 | 5.00  | 0.25  |
| Smp24 - GVG                 | <i>Scorpio maurus palmatus</i>          | IWSFLIKAATKLLGVGSLFGGKKDS   | 26 | 3 |       | 5.94  |
| Smp24-T                     | <i>Scorpio maurus palmatus</i>          | IWSFLIKAATKLLPSLFGG         | 19 | 2 |       | 7.76  |
| Tachyplesin-3               | <i>Tachyplesus gigas</i>                | KWCFRVCYRGICYRKCR           | 17 | 7 | 7.1   | 1.8   |
| Tachyplesin-2               | <i>Tachyplesus tridentatus</i>          | RWCFRVCYRGICYRKCR           | 17 | 7 | 4.1   | 1     |
| Tachyplesin-1               | <i>Tachyplesus gigas</i>                | KWCFRVCYRGICYRRCR           | 17 | 7 | 1.8   | 1.3   |
| Toxin LyeTx 1               | <i>Lycosa erythrognatha</i>             | IWLTALKFLGKNLGKHLAKQQLAKL   | 25 | 5 | 6.66  | 4.65  |
| TsAP2                       | <i>Tityus serrulatus</i>                | FLGMIPGLIGGLISAFK           | 17 | 1 |       | 7.50  |
| Um3                         | <i>Urodacus manicatus</i>               | GFWGKLWEGVKSAL              | 14 | 1 | 15    | 15    |
| Um4                         | <i>Urodacus manicatus</i>               | FFSALLSGIKSLF               | 13 | 1 | 8.00  | 15.00 |
| Um5                         | <i>Urodacus manicatus</i>               | IFKAIWSGIKSLF               | 13 | 2 | 15.00 |       |
| Uy192                       | <i>Urodacus yaschenkoi</i>              | FLSTIWNGIKGLL               | 13 | 1 | 15.00 |       |
| Uy192 [G11S.L13F]           | <i>Urodacus yaschenkoi</i>              | FLSTIWNGIKSLF               | 13 | 1 |       | 8.00  |
| Uy234 [Ins 5.9.12.16K]      | <i>Vaejovis punctatus</i>               | FPFLKLSLKIPKSAIKSAIKRL      | 22 | 6 | 8.00  |       |
| UyCT1                       | <i>Urodacus yaschenkoi</i>              | GFWGKLWEGVKNAI              | 14 | 1 |       | 6.75  |
| UyCT1 - 3K                  | <i>Urodacus yaschenkoi</i>              | GFWGKLWEGVKNAIKKK           | 17 | 4 | 4.00  |       |
| UyCT1 [W7L.N12K]            | <i>Urodacus yaschenkoi</i>              | GFWGKLLEGVKKAI              | 14 | 2 | 15.00 |       |
| UyCT3 [L2F.S3G]             | <i>Urodacus yaschenkoi</i>              | IFGAIWSGIKSLF               | 13 | 1 | 8.00  |       |
| UyCT5                       | <i>Urodacus yaschenkoi</i>              | IWSAIWSGIKGLL               | 13 | 1 |       | 2.75  |
| VCP 5f                      | <i>Vespa magnifica</i>                  | FLPIRPILLGGL                | 13 | 1 |       | 6.84  |
| VCP 5g                      | <i>Vespa magnifica</i>                  | FLIIRRPIVLGGL               | 13 | 2 |       | 6.57  |
| VCP-VT2                     | <i>Vespa tropica</i>                    | FLPIIGKLLSG                 | 11 | 1 | 8.64  | 5.04  |
| Ves-CP-M                    | <i>Vespa magnifica</i>                  | FLPIIGKLLSGLL               | 13 | 1 |       | 8.00  |
| Ves-CP-X                    | <i>Vespa magnifica</i>                  | FLPIIAKLLGGLL               | 13 | 1 |       | 3.66  |
| VESP-VB1                    | <i>Vespa bicolor</i>                    | FMPIIGRLMSGSL               | 13 | 1 | 7.91  | 1.56  |

|              |                                          |                           |    |   |      |       |
|--------------|------------------------------------------|---------------------------|----|---|------|-------|
| VmCT1 [N7K]  | <i>Vaejovis<br/>mexicanus<br/>smithi</i> | FLGALWKVAKSVF             | 13 | 2 | 1.56 | 6.56  |
| VmCT1 [A9W]  | <i>Vaejovis<br/>mexicanus<br/>smithi</i> | FLGALWNVWKS VF            | 13 | 1 | 1.56 | 1.56  |
| VmCT1 [G3K]  | <i>Vaejovis<br/>mexicanus<br/>smithi</i> | FLKALWNVAKSVF             | 13 | 2 | 1.56 | 3.12  |
| VmCT1 [S11K] | <i>Vaejovis<br/>mexicanus<br/>smithi</i> | FLGALWNVAKKVF             | 13 | 2 | 1.56 | 1.56  |
| VmCT2        | <i>Vaejovis<br/>mexicanus<br/>smithi</i> | FLSTLWNAAKSIF             | 13 | 1 |      | 10.00 |
| VpAmp1.0     | <i>Vaejovis<br/>punctatus</i>            | LPFFLLSLIPSAISAIKKI       | 19 | 2 |      | 2.50  |
| VpAmp1.1     | <i>Vaejovis<br/>punctatus</i>            | FFLLSLIPSAISAIKKI         | 17 | 2 |      | 5.00  |
| VpAmp2.0     | <i>Vaejovis<br/>punctatus</i>            | FWGFLGKLAMKAVPSLIGGNKSSSK | 25 | 4 |      | 10.00 |
| VpAmp2.1     | <i>Vaejovis<br/>punctatus</i>            | FWGFLGKLAMKAVPSLIGGNKK    | 22 | 4 |      | 5.00  |
| Xac-2        | <i>Xylocopa<br/>appendiculata</i>        | GFVALLKKLPLILKHL P        | 17 | 3 | 3.12 | 3.12  |



**Table S2.** List of *P. verdolaga*'s hypothetical AMPs.

| <b>Id.</b> | <b>Candidate</b>      | <b>A</b> | <b>B</b> | <b>C</b> | <b>Homologous to</b>          | <b>D</b> | <b>Contig id</b> |
|------------|-----------------------|----------|----------|----------|-------------------------------|----------|------------------|
| PvAMP0     | CFYKCTN               | 7        | 2        | 1.25     | Androctonin                   | 85.71    | Pv_tr_17126.t1   |
| PvAMP1     | CRPKLRC               | 7        | 4        | 1.22     | M-theraphotoxin-Gr1a          | 85.71    | Pv_sp_5188.t1    |
| PvAMP2     | QRAVTCY <sup>†</sup>  | 7        | 2        | 1.25     | cGomesin                      | 85.71    | Pv_tr_14213.t1   |
| PvAMP3     | IQTIKAK <sup>†</sup>  | 7        | 3        | 1.23     | M-zodatoxin-Lt4a              | 85.71    | Pv_sp_1494.t1    |
| PvAMP5     | KQKCVTY               | 7        | 3        | 1.95     | Gomesin                       | 85.71    | Pv_so_5570.t1    |
| PvAMP6     | YKCTYRP               | 7        | 3        | 2.32     | Androctonin                   | 85.71    | Pv_tr_16614.t1   |
| PvAMP7     | SLWGMWR               | 7        | 2        | 2.33     | M-zodatoxin-Lt1a              | 75       | Pv_sp_3683.t1    |
| PvAMP8     | SLFKFLA               | 7        | 2        | 0.52     | Cupiennin-1d                  | 100      | Pv_tr_9174.t1    |
| PvAMP9     | NSLRKVQ               | 7        | 3        | 1.05     | Lt4a                          | 85.71    | Pv_tr_16907.t1   |
| PvAMP11    | INRKLLE               | 7        | 2        | 1.06     | Lt4b                          | 85.71    | Pv_sp_4704.t1    |
| PvAMP12    | AKMREIA               | 7        | 2        | 1.06     | Lycocitin 1                   | 85.71    | Pv_so_4563.t1    |
| PvAMP13    | DKFKAMG               | 7        | 2        | 1.05     | M-zodatoxin-Lt4a              | 85.71    | Pv_tr_17094.t1   |
| PvAMP14    | KEKLKEH               | 7        | 2        | 2.14     | Lycosin-I                     | 100      | Pv_so_3998.t1    |
| PvAMP15    | FLGKNLG               | 7        | 2        | 0.52     | Lycosin-I                     | 100      | Pv_sp_6402.t1    |
| PvAMP16    | LLSKIFG <sup>†</sup>  | 7        | 2        | 0.52     | Bmkn2                         | 100      | Pv_tr_2228.t1    |
| PvAMP17    | GMISAFK               | 7        | 2        | 0.52     | TsAP2                         | 85.71    | Pv_sp_6035.t1    |
| PvAMP18    | KIIPNLF               | 7        | 2        | 0.52     | Meucini-18                    | 85.71    | Pv_sp_2233.t1    |
| PvAMP19    | FVFKLIP               | 7        | 2        | 0.52     | AcrAP2a                       | 85.71    | Pv_tr_2209.t1    |
| PvAMP20    | IKKLISK               | 7        | 4        | 1.57     | AamAP1                        | 100      | Pv_sp_1634.t1    |
| PvAMP21    | LVKAVRK               | 7        | 4        | 1.4      | AaeAP1 [S4.8.15K; A11K. N19K] | 85.71    | Pv_sp_6551.t1    |
| PvAMP22    | LLPSIFK               | 7        | 2        | 0.52     | Css54                         | 85.71    | Pv_sp_192.t1     |
| PvAMP23    | RIGRILR               | 7        | 4        | 1.05     | Scolopendin 2                 | 85.71    | Pv_sp_225.t1     |
| PvAMP24    | VTYTRDR               | 7        | 2        | 1.42     | Gomesin (4-18) [Q9p]          | 85.71    | Pv_tr_1752.t1    |
| PvAMP25    | IWKIKKL               | 7        | 4        | 2.56     | IsCT precursor                | 100      | Pv_sp_743.t1     |
| PvAMP26    | VLGKIWK               | 7        | 3        | 2.04     | IsCT precursor                | 85.71    | Pv_sp_13985.t1   |
| PvAMP27    | GLLKNVF               | 7        | 2        | 0.52     | Meucini-13                    | 85.71    | Pv_sp_7193.t1    |
| PvAMP28    | KLLSKIF               | 7        | 3        | 1.05     | Bmkn2                         | 100      | Pv_sp_556.t1     |
| PvAMP29    | IFKSLWS               | 7        | 2        | 1.51     | Um5                           | 71.43    | Pv_sp_550.t1     |
| PvAMP30    | LLTGIKS               | 7        | 2        | 0.52     | Um4                           | 85.71    | Pv_sp_8010.t1    |
| PvAMP31    | ILGKILR               | 7        | 3        | 0.87     | IsCT [WL6. SK11]              | 100      | Pv_so_7688.t1    |
| PvAMP32    | IIKKIWK               | 7        | 4        | 2.56     | IsCT-P                        | 85.71    | Pv_so_7981.t1    |
| PvAMP33    | RVAKSVF               | 7        | 3        | 0.87     | VmCT1                         | 100      | Pv_tr_5074.t1    |
| PvAMP34    | LWNVVKK               | 7        | 3        | 2.04     | VmCT1 [S11K]                  | 85.71    | Pv_tr_5073.t1    |
| PvAMP35    | NIWKSIV               | 7        | 2        | 2.24     | VmCT1 [A9W]                   | 71.43    | Pv_sp_1355.t1    |
| PvAMP36    | VCYKGHCY <sup>†</sup> | 8        | 2        | 1.9      | Polyphemusin-2                | 87.5     | Pv_tr_15238.t1   |
| PvAMP37    | KILKHVIK <sup>†</sup> | 8        | 4        | 1.56     | PNG-1/6                       | 87.5     | Pv_sp_2023.t1    |
| PvAMP38    | YIQTWHTK <sup>†</sup> | 8        | 2        | 2.3      | M-zodatoxin-Lt4b              | 100      | Pv_tr_7193.t1    |
| PvAMP39    | RGYKGGHC <sup>†</sup> | 8        | 3        | 1.58     | OsDef2 (16-37)                | 87.5     | Pv_sp_11752.t1   |
| PvAMP41    | KCEGNRR               | 8        | 3        | 1.23     | κ-theraphotoxin-Gr4a          | 72.73    | Pv_sp_3172.t1    |
| PvAMP42    | FADLKRL               | 8        | 3        | 1.22     | M-zodatoxin-Lt5a              | 87.5     | Pv_tr_11159.t1   |
| PvAMP43    | VAKTVTKQ              | 8        | 3        | 1.07     | M-ctenitoxin-Cs1a             | 87.5     | Pv_sp_67.t1      |
| PvAMP45    | RKLMEINL              | 8        | 2        | 0.92     | Lt4a                          | 75       | Pv_tr_7666.t1    |
| PvAMP46    | DRKLMQII              | 8        | 2        | 0.92     | Lt4a                          | 62.5     | Pv_sp_3014.t1    |
| PvAMP47    | LTKMKEIA              | 8        | 2        | 1.08     | Lycocitin 1                   | 87.5     | Pv_sp_2708.t1    |
| PvAMP48    | KAMKAIK               | 8        | 4        | 1.38     | Lycosin-I                     | 87.5     | Pv_tr_4264.t1    |
| PvAMP49    | KDKLKEHM              | 8        | 2        | 1.72     | Lycosin-I                     | 75       | Pv_tr_3957.t1    |
| PvAMP50    | FKAMKGVA              | 8        | 3        | 0.92     | Lycosin-I                     | 75       | Pv_tr_1918.t1    |
| PvAMP51    | LLSRIFGK              | 8        | 3        | 0.76     | Bmkn2                         | 87.5     | Pv_tr_9659.t1    |
| PvAMP52    | VRNAIRKK              | 8        | 5        | 1.53     | UyCT1 - 3K                    | 75       | Pv_tr_9657.t1    |
| PvAMP53    | KLAAKIIP              | 8        | 3        | 0.92     | Meucini-18                    | 87.5     | Pv_sp_1006.t1    |
| PvAMP54    | SGMISAFK              | 8        | 2        | 0.46     | Marmelittin                   | 87.5     | Pv_sp_6035.t1    |
| PvAMP56    | KGLLKDFK              | 8        | 3        | 1.38     | AcrAP2a                       | 87.5     | Pv_sp_2642.t1    |
| PvAMP57    | PGAIIKLI              | 8        | 3        | 0.92     | AamAP1                        | 87.5     | Pv_sp_2640.t1    |
| PvAMP58    | IPKVVKGM              | 8        | 3        | 0.92     | AaeAP1 [S4.8.15K; A11K. N19K] | 75       | Pv_sp_5515.t1    |
| PvAMP59    | FPVGRVAR              | 8        | 3        | 0.61     | Scolopendin 2                 | 75       | Pv_sp_6943.t1    |
| PvAMP60    | GAIAKLLS              | 8        | 2        | 0.46     | Bmkn2                         | 87.5     | Pv_tr_6401.t1    |

|          |                               |    |   |      |                               |       |                |
|----------|-------------------------------|----|---|------|-------------------------------|-------|----------------|
| PvAMP61  | LSTRWNGI                      | 8  | 2 | 1.17 | Uy192                         | 87.5  | Pv_tr_13580.t1 |
| PvAMP62  | LGKILDIK                      | 8  | 2 | 0.92 | IsCT [WL6]                    | 77.78 | Pv_tr_13579.t1 |
| PvAMP63  | ALNVAKSV                      | 8  | 2 | 0.46 | VmCT1 [G3K]                   | 88.98 | Pv_tr_7191.t1  |
| PvAMP64  | KALWNILK                      | 8  | 3 | 1.78 | VmCT1 [G3K]                   | 75    | Pv_so_8363.t1  |
| PvAMP65  | ALWNILKK                      | 8  | 3 | 1.78 | VmCT1 [S11K]                  | 75    | Pv_so_8363.t1  |
| PvAMP66  | WKKIKKFF                      | 8  | 5 | 2.7  | IsCT [EK7. GP8. SK11]         | 75    | Pv_tr_5073.t1  |
| PvAMP67  | KLLNGVKK                      | 8  | 4 | 1.38 | UyCT1 [W7L.N12K]              | 87.5  | Pv_sp_1577.t1  |
| PvAMP68  | LEGVKRAV                      | 8  | 2 | 0.92 | UyCT1 [W7L.N12K]              | 75    | Pv_sp_5735.t1  |
| PvAMP69  | YRARCVIYC                     | 9  | 3 | 1.67 | Gomesin c(1-18)[Gln1]         | 66.67 | Pv_tr_6713.t1  |
| PvAMP70  | QAVLKRLLA                     | 9  | 3 | 0.82 | Oxyopinin-4a                  | 88.89 | Pv_tr_6712.t1  |
| PvAMP71  | TKPYMLKDN                     | 9  | 2 | 1.38 | Cupiennin-2a                  | 66.67 | Pv_tr_4146.t1  |
| PvAMP72  | AKIPGKVVR                     | 9  | 4 | 1.09 | Cupiennin-2a                  | 77.78 | Pv_tr_4145.t1  |
| PvAMP73  | NKDFKTLK                      | 9  | 4 | 1.63 | OxTx1                         | 77.78 | Pv_sp_260.t1   |
| PvAMP74  | FLSKMKEIA <sup>†</sup>        | 9  | 2 | 0.96 | Lycocitin 1                   | 88.89 | Pv_tr_8904.t1  |
| PvAMP75  | RHLVKQQLS                     | 9  | 3 | 1.12 | M-lycotoxin-Hc1a              | 87.5  | Pv_tr_15055.t1 |
| PvAMP77  | LYSMIPKAV                     | 9  | 2 | 0.97 | AamAP1 [H8K]                  | 66.67 | Pv_so_8056.t1  |
| PvAMP78  | IPKALKNLI                     | 9  | 3 | 0.82 | AamAP1                        | 77.78 | Pv_tr_16804.t1 |
| PvAMP79  | PKKGLVRAI                     | 9  | 4 | 1.09 | AaeAP1 [S4.8.15K; A11K. N19K] | 72.73 | Pv_so_5175.t1  |
| PvAMP80  | VFKLFHKKK                     | 9  | 5 | 1.79 | Css54                         | 77.78 | Pv_sp_716.t1   |
| PvAMP81  | FSGNKLLPG                     | 9  | 2 | 0.41 | Im-5                          | 80    | Pv_so_3641.t1  |
| PvAMP82  | GRIFRLLRK                     | 9  | 5 | 1.22 | Scolopendin 2                 | 88.89 | Pv_so_3638.t1  |
| PvAMP83  | GRIGRLVLR                     | 9  | 4 | 0.82 | Scolopendin 2                 | 88.99 | Pv_sp_5222.t1  |
| PvAMP84  | ILKPFMLRR                     | 9  | 4 | 0.95 | Scolopin 2                    | 77.78 | Pv_sp_312.t1   |
| PvAMP85  | KPHHRTVTY                     | 9  | 3 | 1.56 | Gomesin (4-18) [Q9p]          | 77.78 | Pv_so_1476.t1  |
| PvAMP86  | WSSIWAGMK                     | 9  | 2 | 1.95 | UyCT5                         | 66.67 | Pv_tr_75378.t1 |
| PvAMP87  | IAALLKSIY                     | 9  | 2 | 0.97 | Meucin-13                     | 66.67 | Pv_sp_3763.t1  |
| PvAMP88  | GPFWTGIKS                     | 9  | 2 | 1.18 | UyCT3 [L2F.S3G]. D1           | 66.67 | Pv_sp_3762.t1  |
| PvAMP89  | LWQGSKSAI                     | 9  | 2 | 1.32 | Um3                           | 77.78 | Pv_tr_1841.t1  |
| PvAMP91  | GKLLEGLKK                     | 9  | 3 | 1.36 | UyCT1 [W7L.N12K]              | 88.89 | Pv_sp_2709.t1  |
| PvAMP92  | LLDGVKKFI                     | 9  | 2 | 0.82 | UyCT1 [W7L.N12K]              | 85.71 | Pv_tr_10673.t1 |
| PvAMP95  | DKCCDNCTRK                    | 10 | 2 | 0.98 | κ-theraphotoxin-Gr4c          | 62.5  | Pv_sp_13803.t1 |
| PvAMP164 | RSVLKAHCRICRRRG               | 15 | 7 | 1.16 | Androctonin                   | 61.11 | Pv_so_8460.t1  |
| PvAMP169 | CRRVCYKNRCVTYCRG <sup>†</sup> | 16 | 6 | 1.47 | Gomesin c(1-18)[Gln1]         | 87.5  | Pv_sp_11662.t1 |
| PvAMP170 | CNKLRSDHFHLCNFQF              | 16 | 2 | 0.64 | M-theraphotoxin-Gr1a          | 56.25 | Pv_sp_11936.t1 |
| PvAMP172 | CRKLCFRNRCLTYCRGR             | 17 | 7 | 1.23 | cGomesin                      | 70.59 | Pv_tr_7912.t1  |
| PvAMP177 | QCRKLCFRNRCLTYCRGR            | 18 | 7 | 1.24 | Gomesin c(1-18)[Gln1]         | 72.22 | Pv_tr_7912.t1  |
| PvAMP179 | VKMCRWTKSMLRGRGGCY            | 18 | 6 | 1.48 | Androctonin                   | 50    | Pv_sp_11670.t1 |
| PvAMP183 | QCRKLCFRNRCLTYCRGRG           | 19 | 7 | 1.17 | Gomesin c(1-18)[Gln1]         | 72.22 | Pv_tr_7912.t1  |

Note: <sup>†</sup> Sequence predicted from the HMMER3 strategy. A: Peptide length. B: Peptide positive charge. C: Amphipathic index. D: Peptide identity percentage towards homologous peptide within the cDB.

**Table S3.** LC/MS analysis of *P. verdolaga*'s AMPs.

|          |                                     |              | m/z ratio |        |       |       |       |       |               |       |  |
|----------|-------------------------------------|--------------|-----------|--------|-------|-------|-------|-------|---------------|-------|--|
| AMP      | Sequence                            | Theoric mass | +1        | +2     | +3    | +4    | +5    | +6    | Observed ions |       |  |
| PvAMP7   | SLWGMWR-NH <sub>2</sub>             | 934.12 Da    | 935.1     | 468.1  | 312.4 | 234.5 | 187.8 | 156.7 | 934.6         | 468.9 |  |
| PvAMP32  | IIKKIWK-NH <sub>2</sub>             | 927.23 Da    | 928.2     | 464.6  | 310.1 | 232.8 | 186.4 | 155.5 | 464.6         | 310   |  |
| PvAMP66  | WKKIKKFF-NH <sub>2</sub>            | 1123.43 Da   | 1124      | 562.7  | 375.5 | 281.9 | 225.7 | 188.2 | 375.4         |       |  |
| PvAMP69  | YRARCVIYC-NH <sub>2</sub>           | 1145.41 Da   | 1146      | 573.7  | 382.8 | 287.4 | 230.1 | 191.9 | 573.5         |       |  |
| PvAMP82  | GRIFRLLRK-NH <sub>2</sub>           | 1157.46 Da   | 1159      | 579.7  | 386.8 | 290.4 | 232.5 | 193.9 | 579.7         | 386.7 |  |
| PvAMP164 | RSVLKAHCRICRRRG-NH <sub>2</sub>     | 1810.22 Da   | 1811      | 906.1  | 604.4 | 453.6 | 363   | 302.7 | 604           | 453.3 |  |
| PvAMP172 | CRKLCFRNRCLTYCRGR-NH <sub>2</sub>   | 2147.63 Da   | 2149      | 1074.8 | 716.9 | 537.9 | 430.5 | 358.9 | 716.9         |       |  |
| PvAMP177 | QCRKLCFRNRCLTYCRGR-NH <sub>2</sub>  | 2275.76 Da   | 2277      | 1138.9 | 759.6 | 569.9 | 456.2 | 380.3 | 570.1         | 457   |  |
| PvAMP183 | QCRKLCFRNRCLTYCRGRG-NH <sub>2</sub> | 2332.82 Da   | 2334      | 1167.4 | 778.6 | 584.2 | 467.6 | 389.8 | 583.5         | 467   |  |

**Table S4.** IC<sub>50</sub> values for isobologram analysis.

|                 |                 |                 |                 |                 |                |                 |      |     |
|-----------------|-----------------|-----------------|-----------------|-----------------|----------------|-----------------|------|-----|
| Gentamicin (μM) | 50              | 25              | 12.50           | 6.25            | 3.12           | 1.56            | 0.39 | 0.1 |
| PvAMP66 (μM)    | 17.01           | 29.096          | 31.75           | 29.27           | 9.85           | 15.53           | NC   | NC  |
|                 | (10.01 - 23.19) | (25.59 - 32.62) | (26.89 - 37.26) | (26.52 - 32.23) | (7.81 - 11.89) | (13.50 - 17.77) |      |     |

Note: In parentheses 95% confidence intervals. NC = Logistic or linear regression with Pearson’s correlation coefficient ( $R^2$ ) < 0.70.

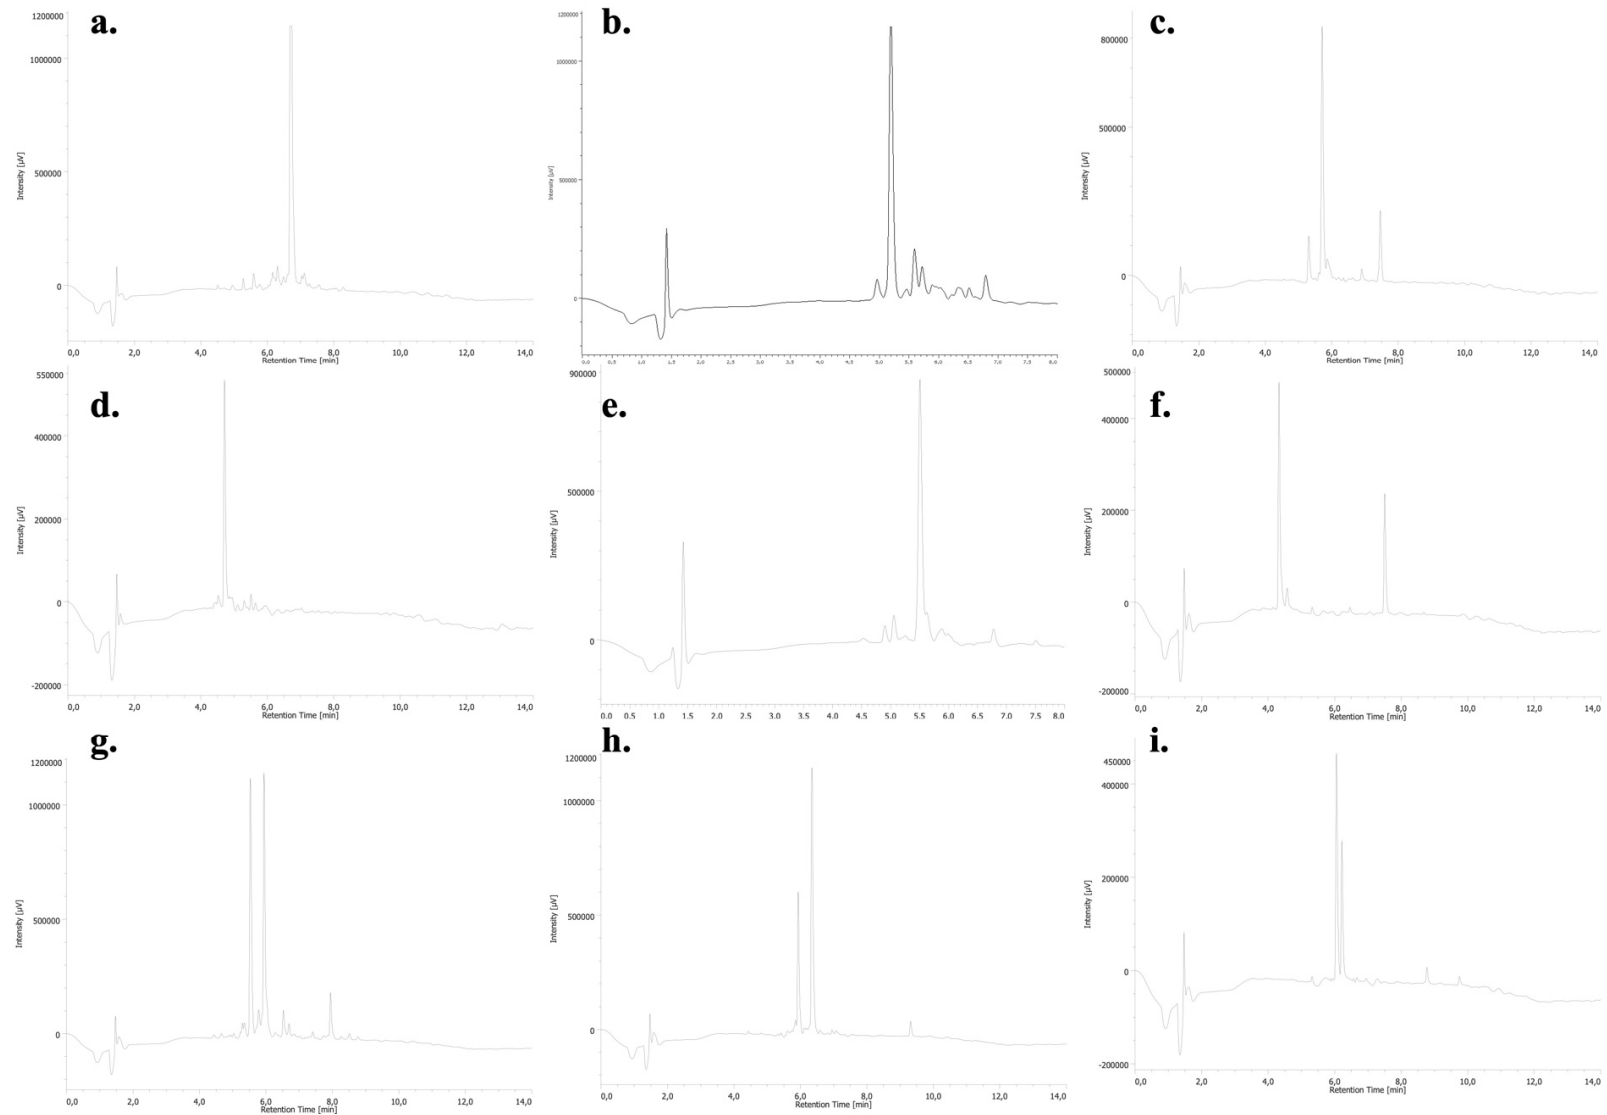

**Figure S1.** RP-HPLC analysis of *P. verdolaga*'s AMPs: (a) Peptide PvAMP7. (b) Peptide PvAMP32. (c) Peptide PvAMP66. (d) Peptide PvAMP69. (e) Peptide PvAMP82. (f) Peptide PvAMP164. (g) Peptide PvAMP172. (h) Peptide PvAMP177. (i) Peptide PvAMP183.

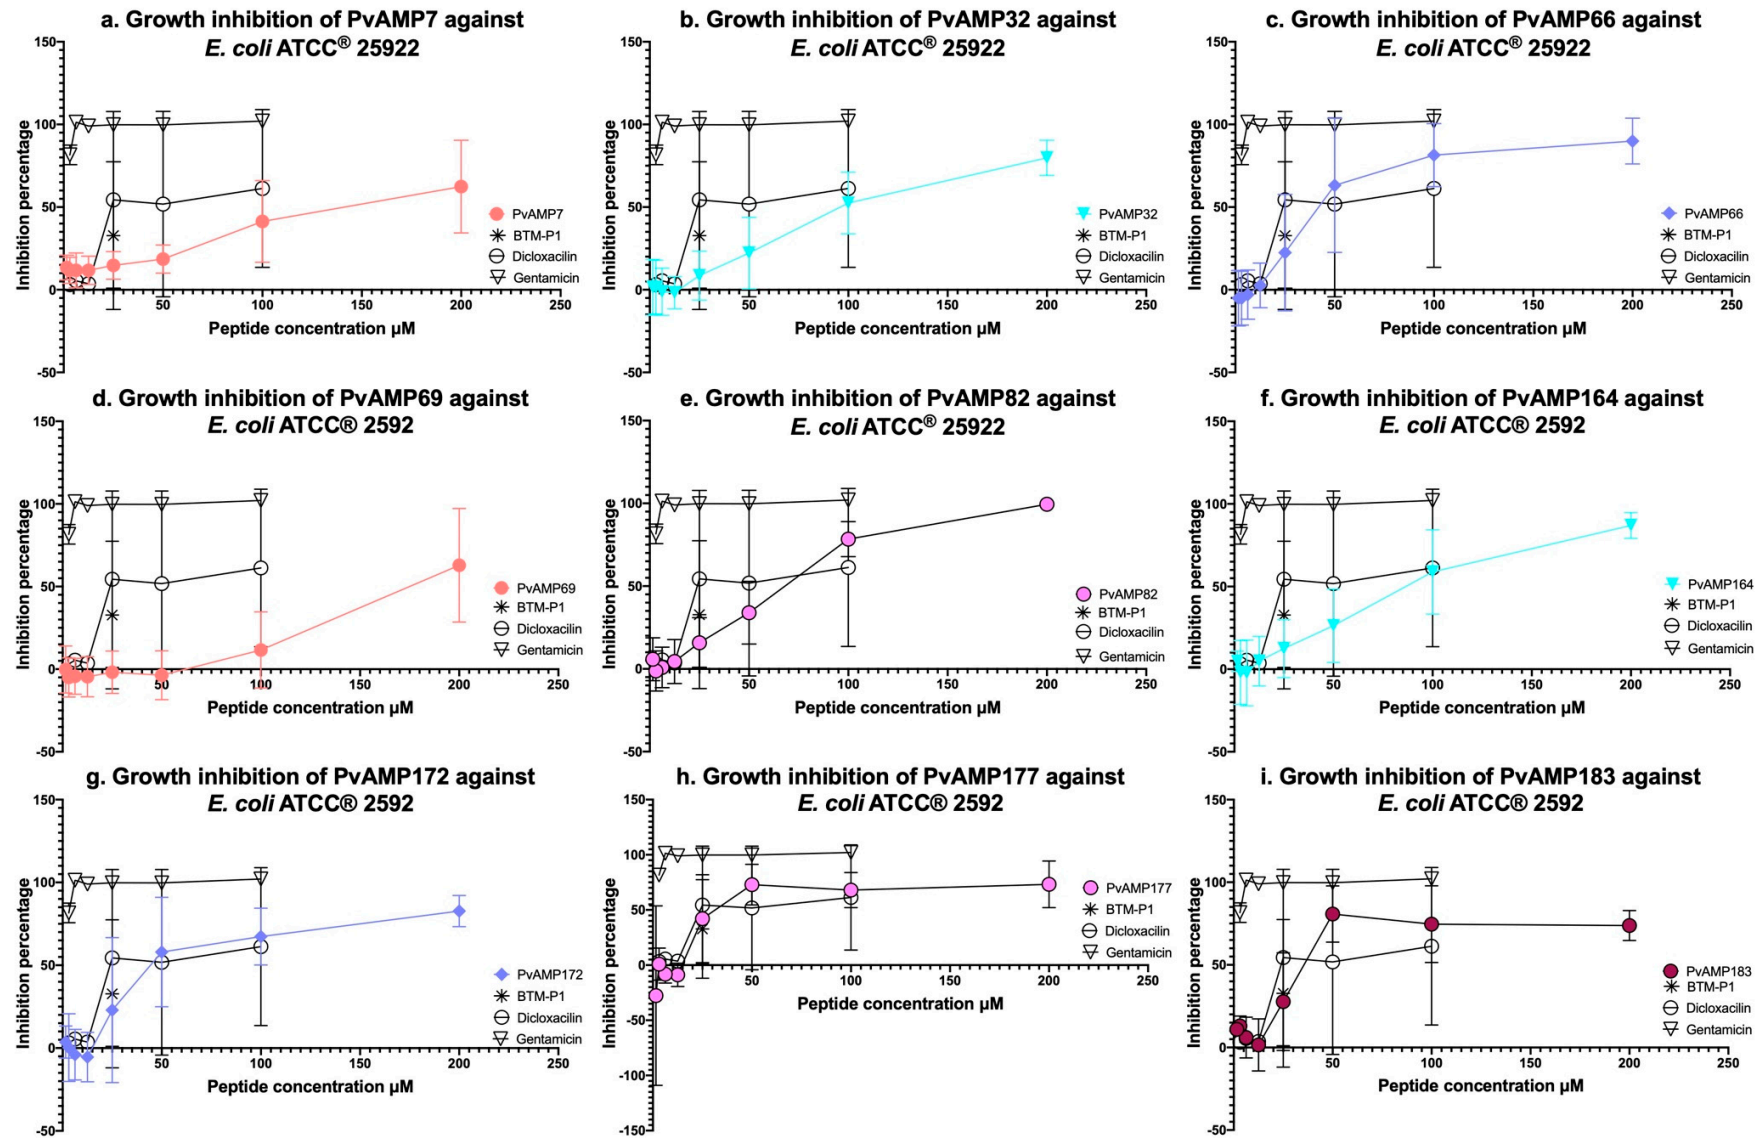

**Figure S2.** Dose-response curves of *P. verdolaga*'s AMPs against *E. coli* ATCC® 25922: (a) PvAMP7; (b) PvAMP32; (c) PvAMP66; (d) PvAMP69; (e) PvAMP82; (f) PvAMP164; (g) PvAMP172; (h) PvAMP177; (i) PvAMP183.

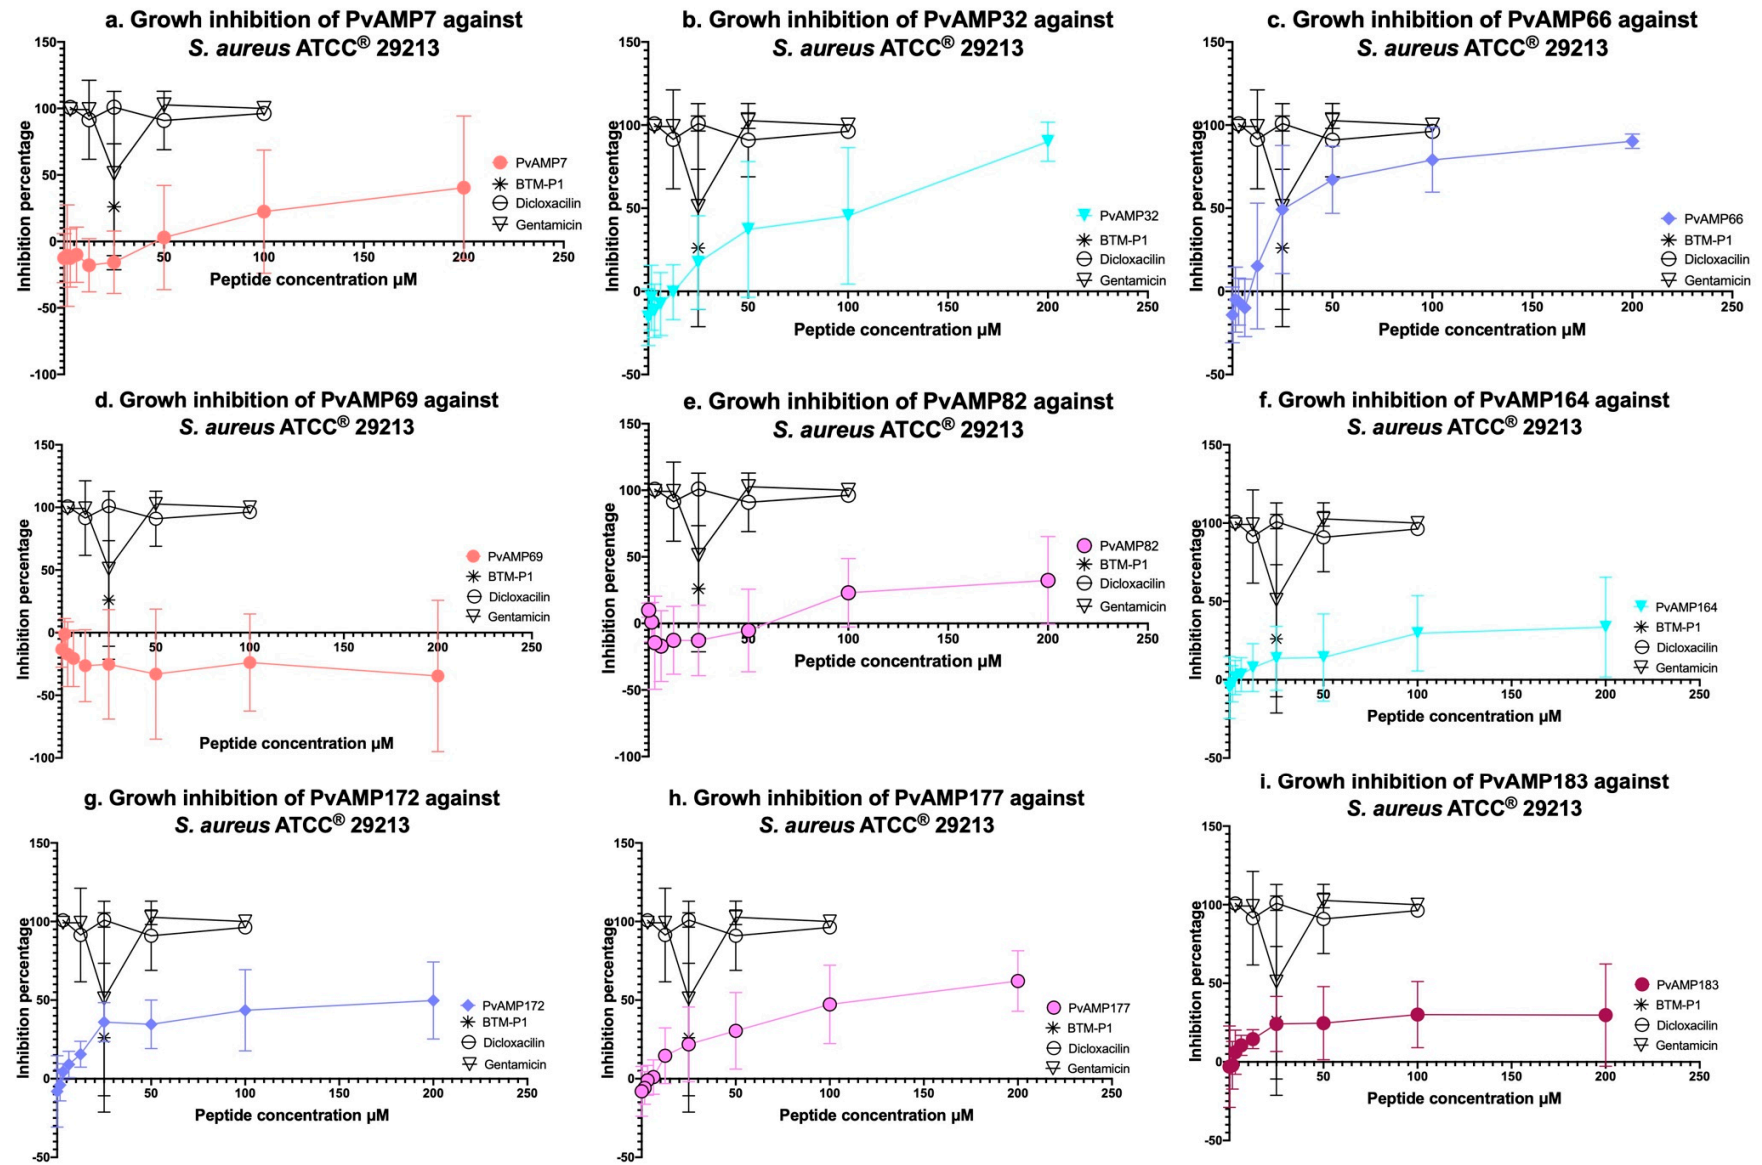

**Figure S3.** Dose-response curves of *P. verdolaga*'s AMPs against *S. aureus* ATCC® 29213: (a) PvAMP7; (b) PvAMP32; (c) PvAMP66; (d) PvAMP69; (e) PvAMP82; (f) PvAMP164; (g) PvAMP172; (h) PvAMP177; (i) PvAMP183.

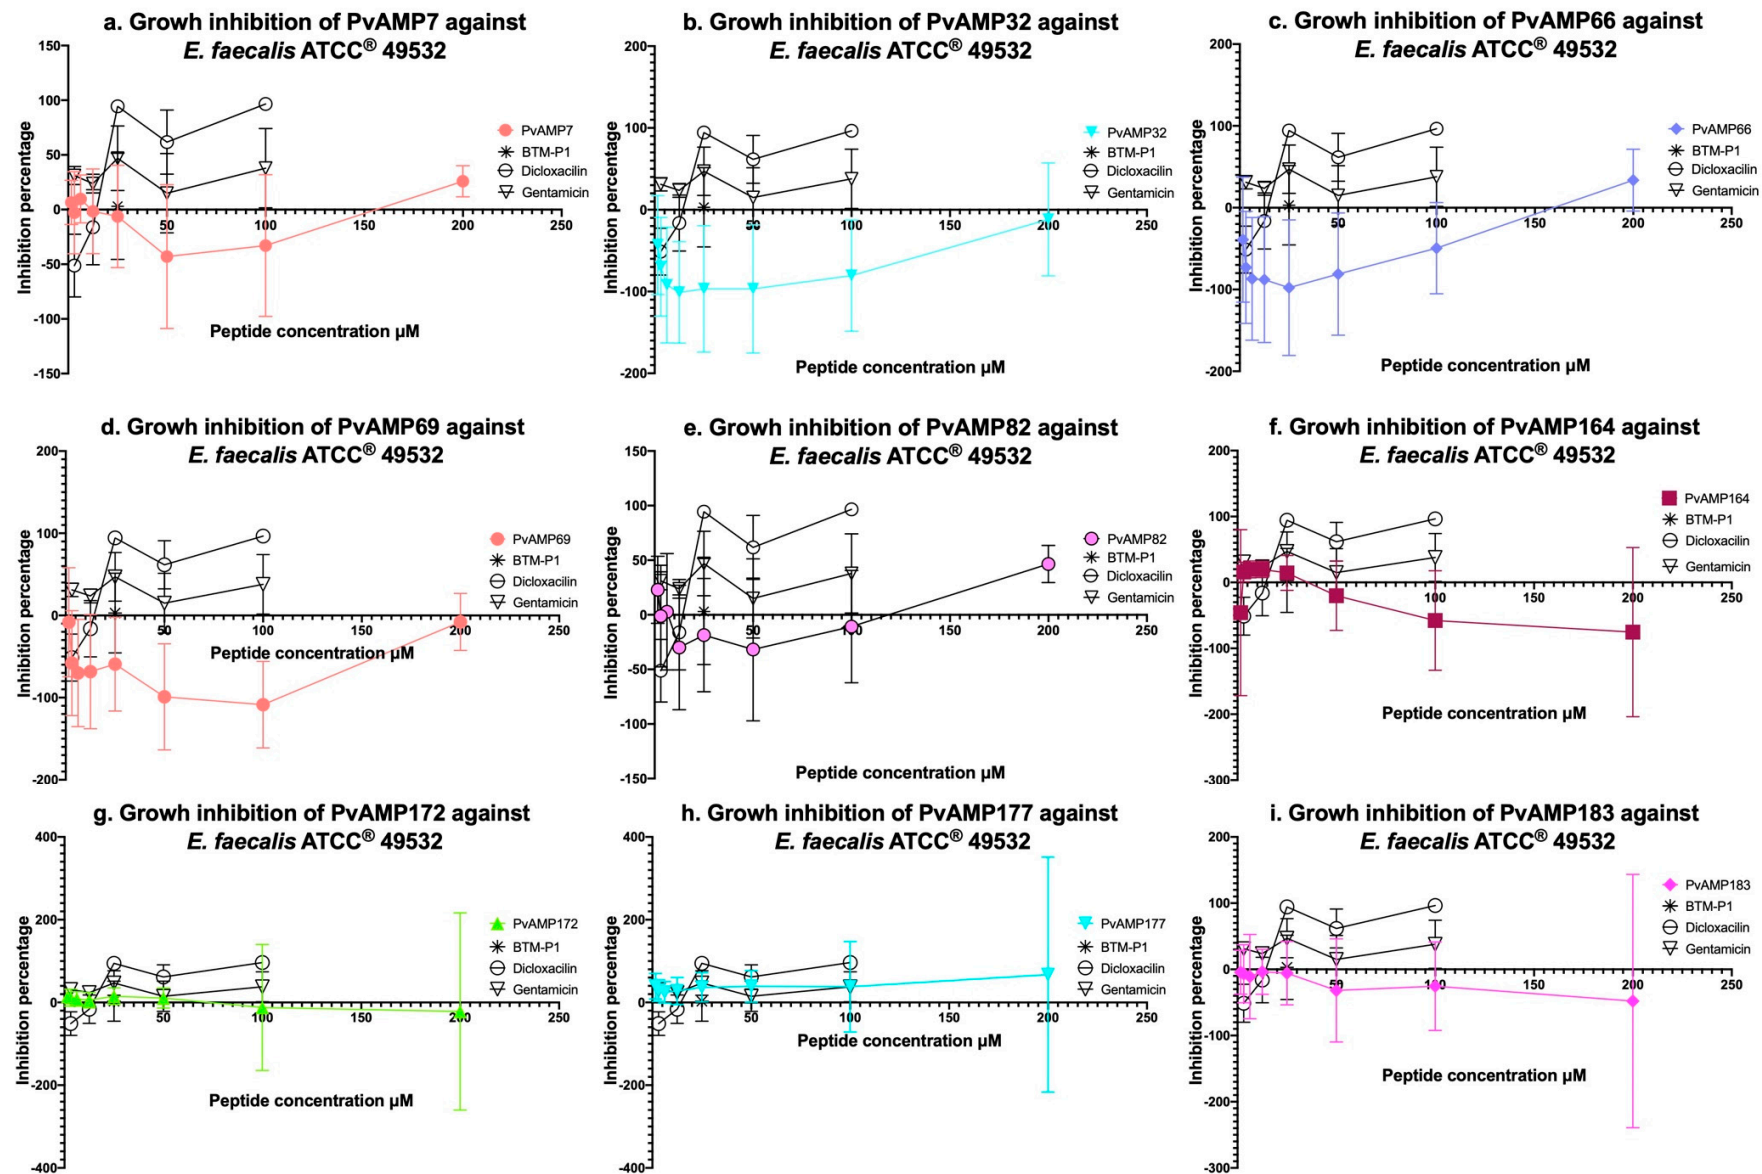

**Figure S4.** Dose-response curves of *P. verdolaga*'s AMPs against *E. faecalis* ATCC® 49532: (a) PvAMP7; (b) PvAMP32; (c) PvAMP66; (d) PvAMP69; (e) PvAMP82; (f) PvAMP164; (g) PvAMP172; (h) PvAMP177; (i) PvAMP183.



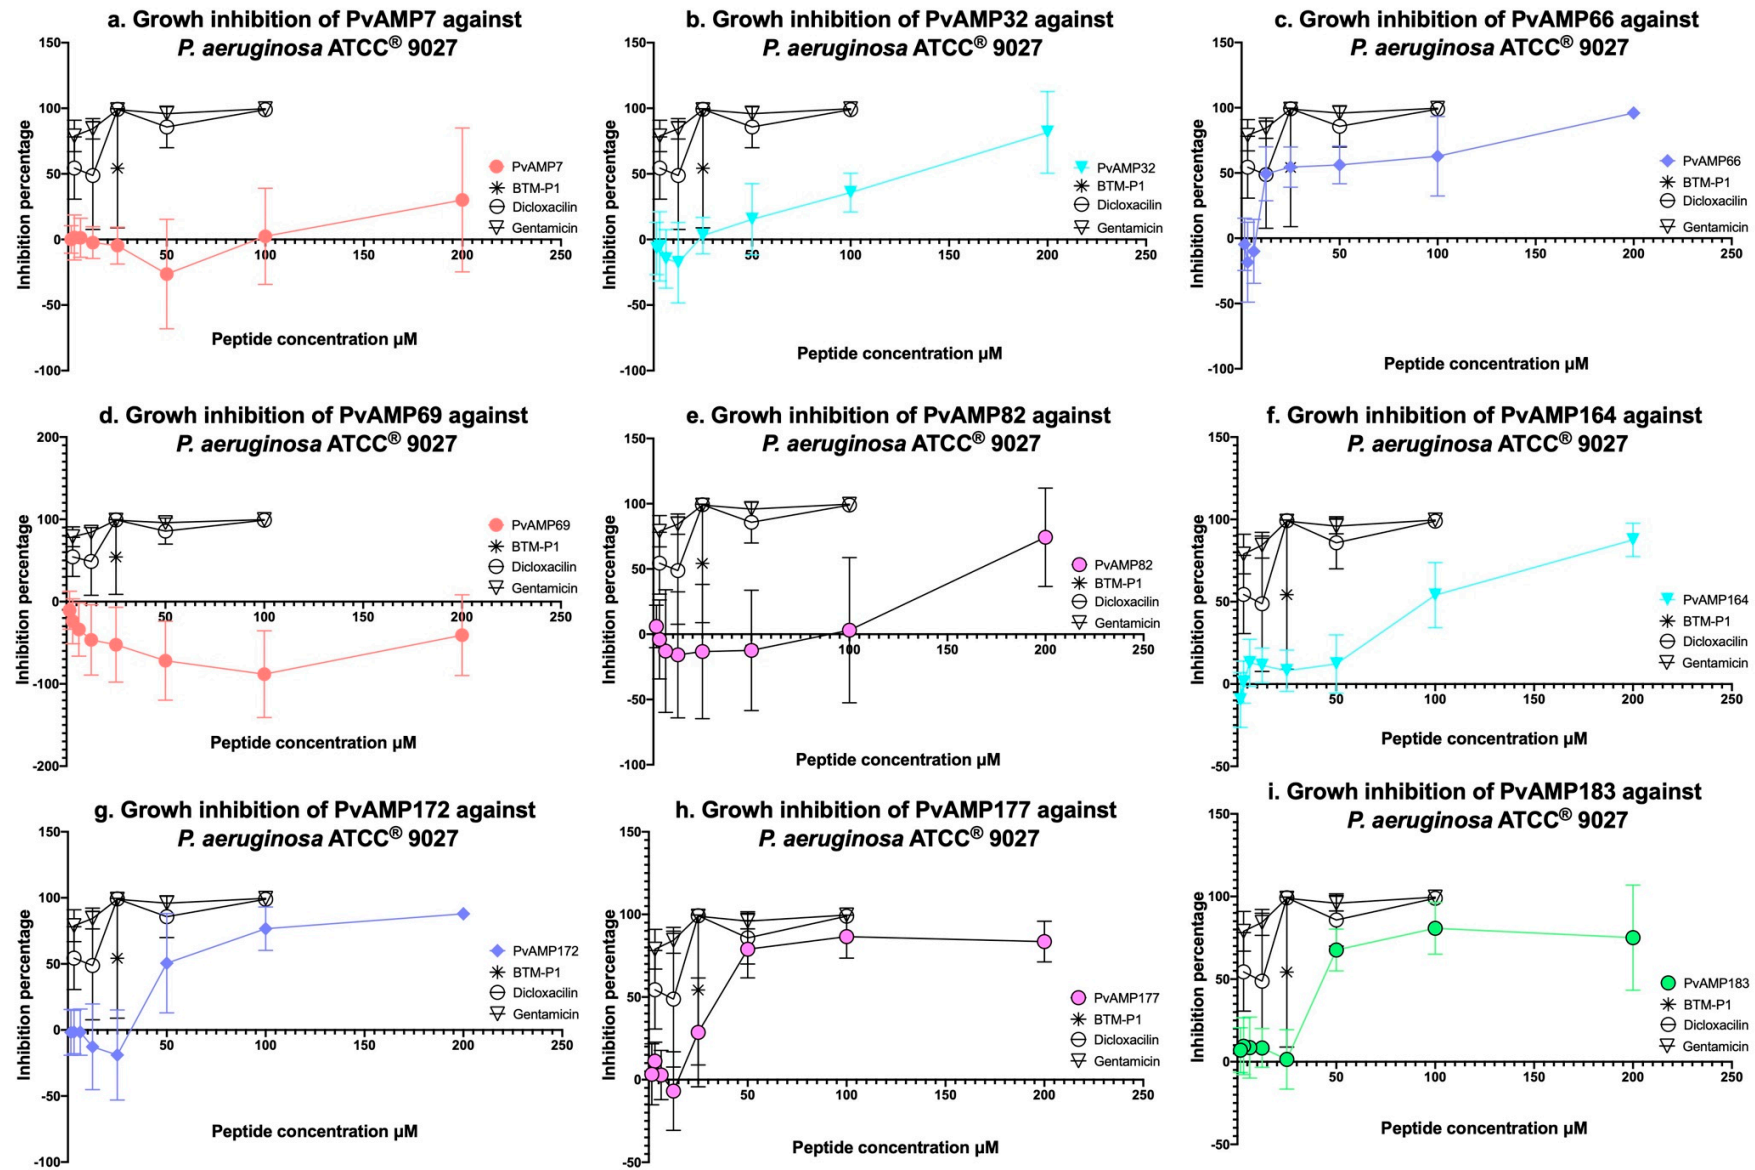

**Figure S5.** Dose-response curves of *P. verdolaga*'s AMPs against *P. aeruginosa* ATCC® 9027 (a) PvAMP7; (b) PvAMP32; (c) PvAMP66; (d) PvAMP69; (e) PvAMP82; (f) PvAMP164; (g) PvAMP172; (h) PvAMP177; (i) PvAMP183.

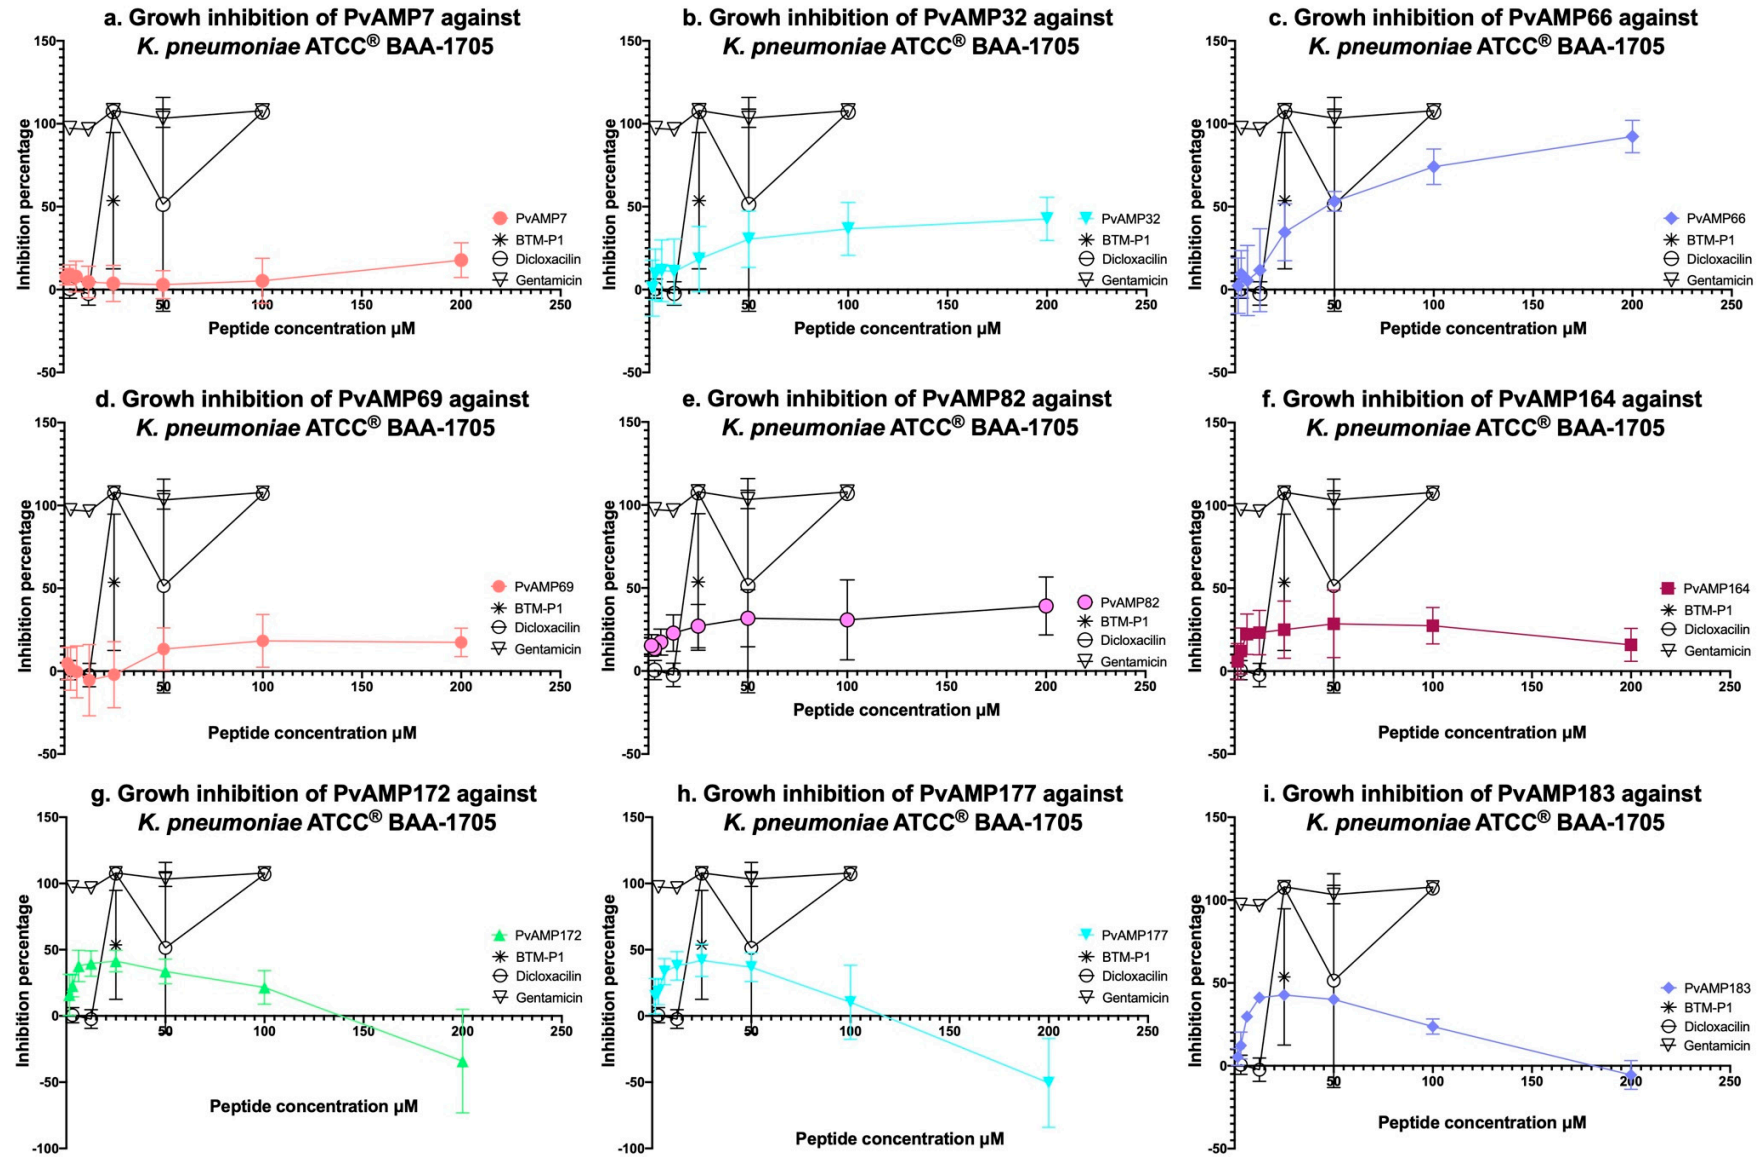

**Figure S6.** Dose-response curves of *P. verdolaga*'s AMPs against *K. pneumoniae* ATCC® BAA-1705: (a) PvAMP7; (b) PvAMP32; (c) PvAMP66; (d) PvAMP69; (e) PvAMP82; (f) PvAMP164; (g) PvAMP172; (h) PvAMP177; (i) PvAMP183.

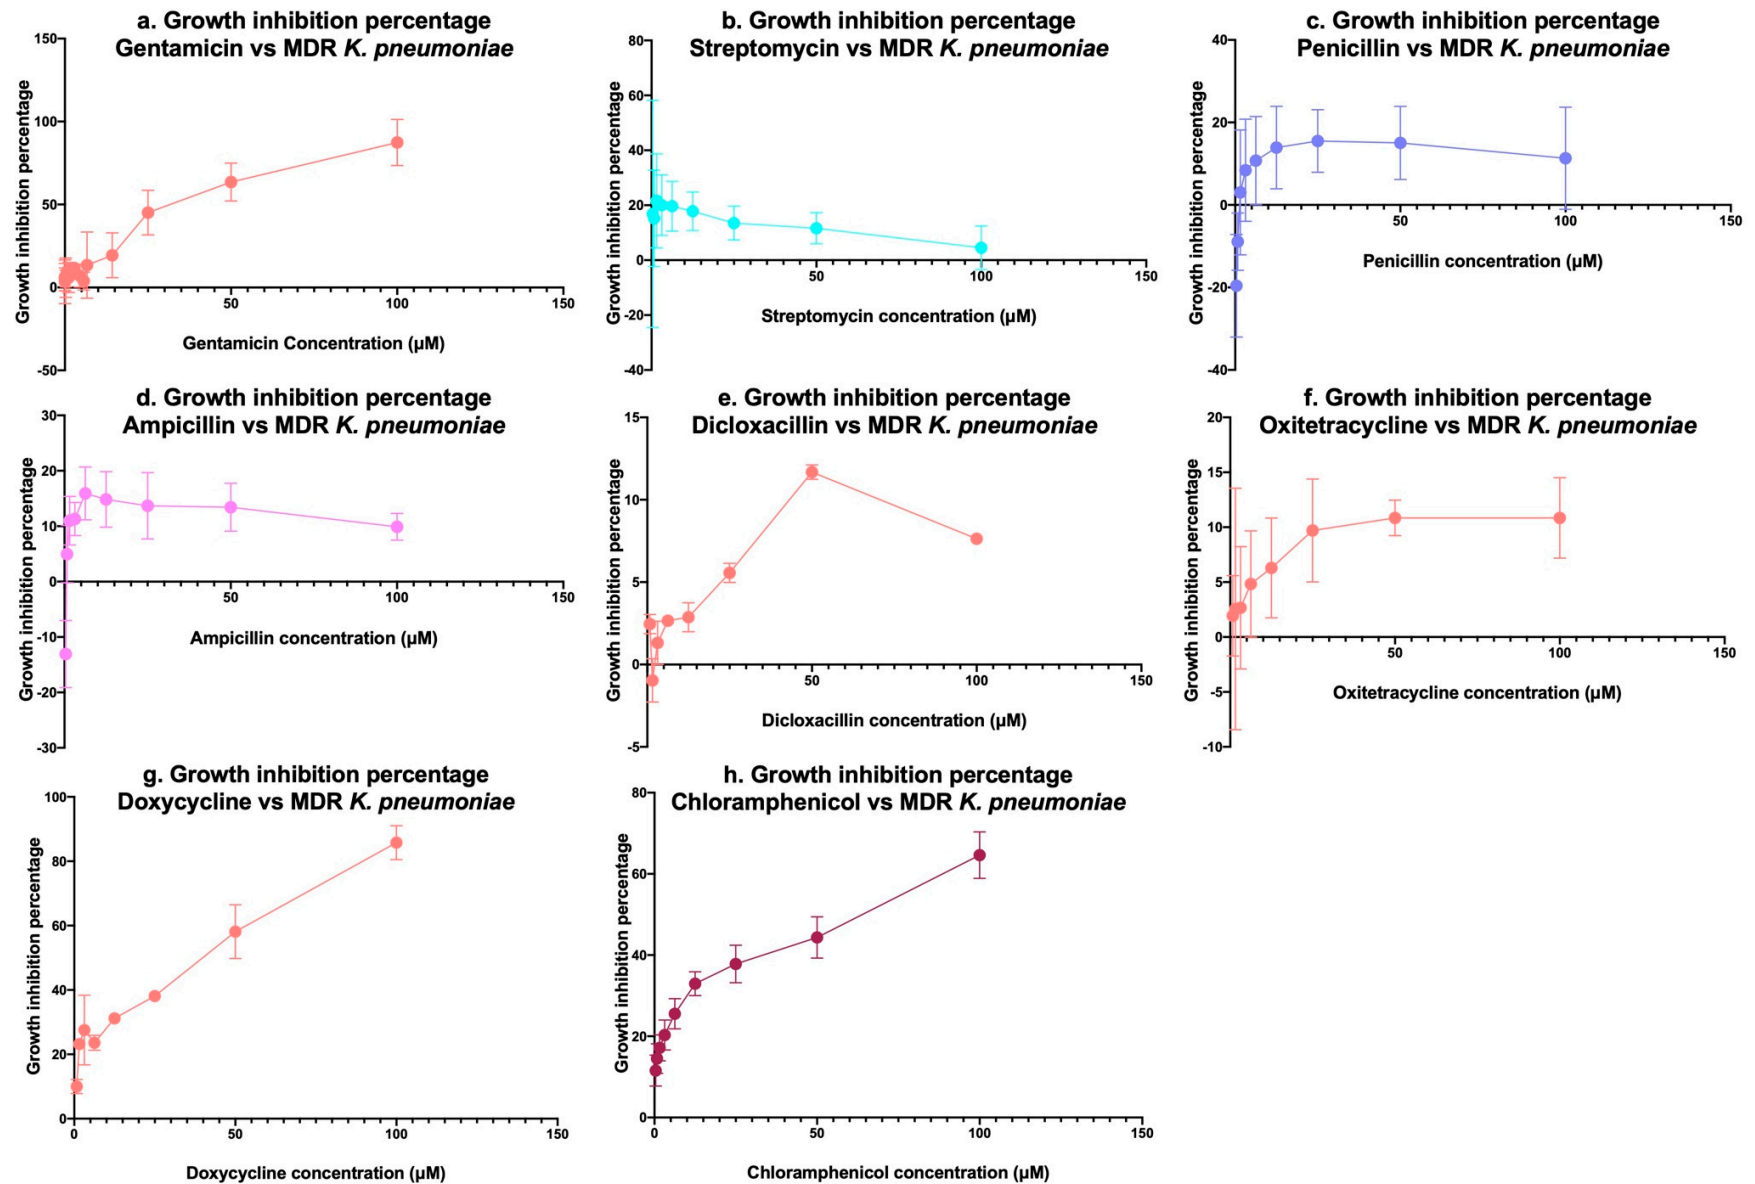

**Figure S7.** Dose-response curves of MDR *K. pneumoniae* against: (a) Gentamicin; (b) Streptomycin; (c) Penicillin; (d) Ampicillin; (e) Dicloxacillin; (f) Oxytetracycline; g(g) Doxycycline; (h) Chloramphenicol.

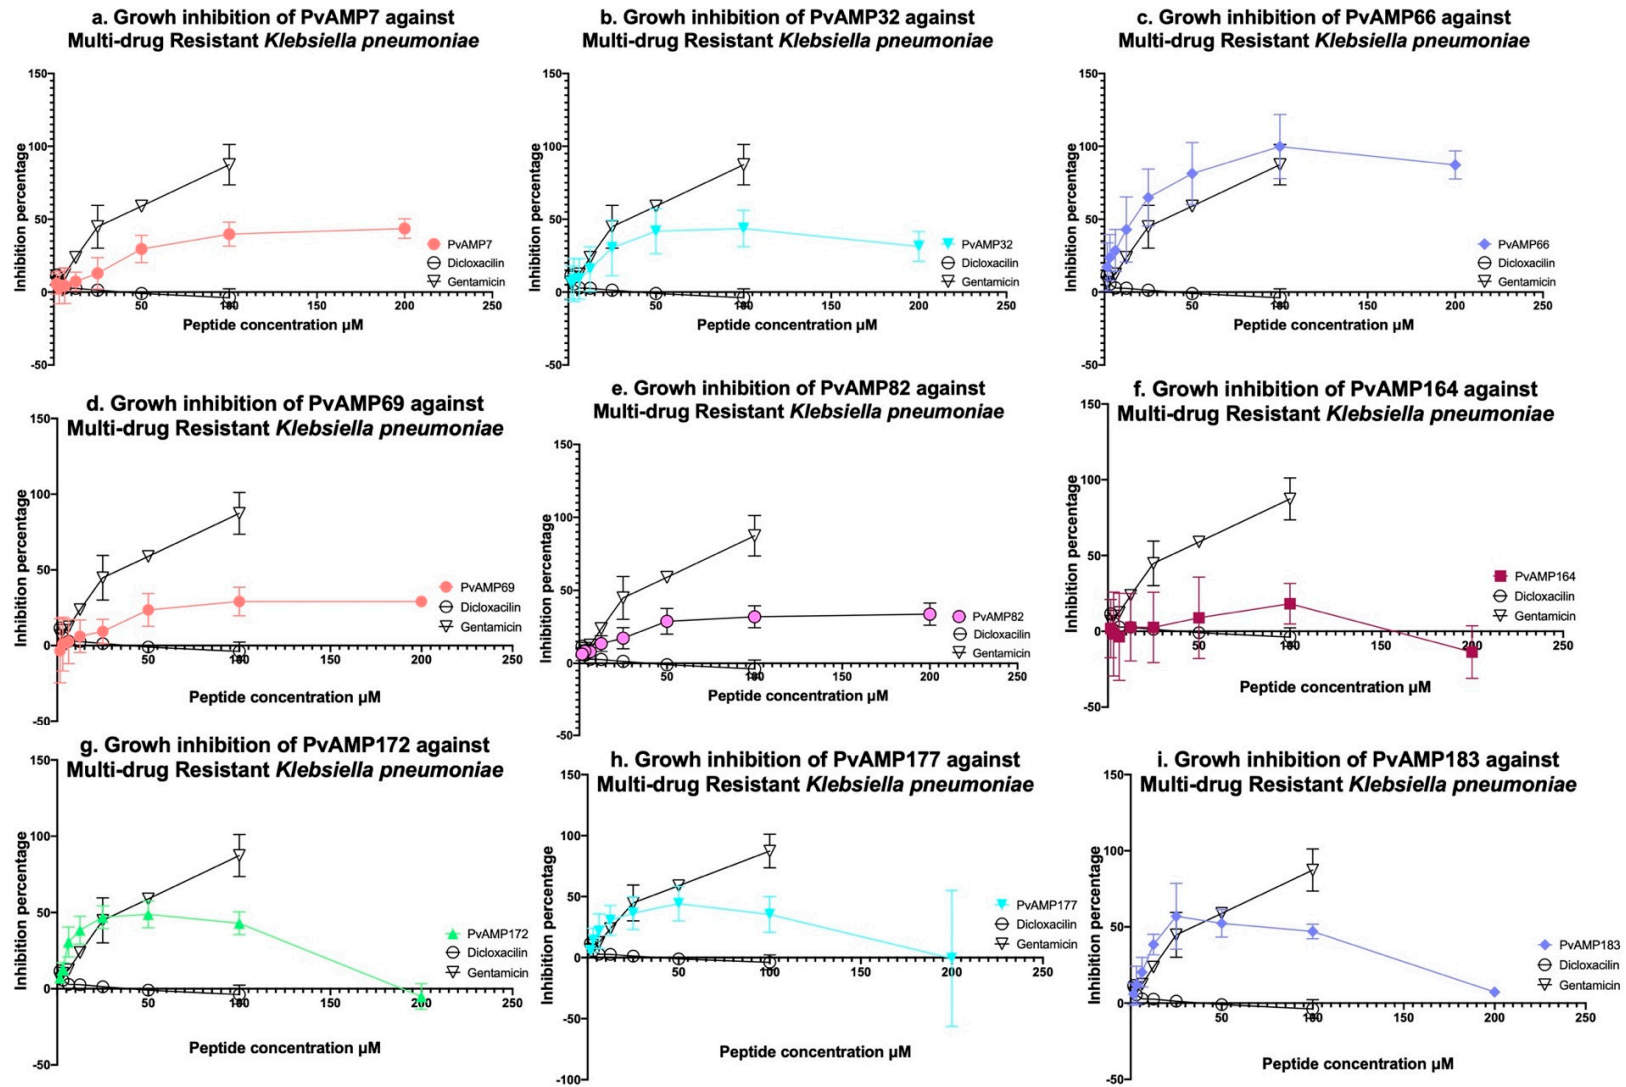

**Figure S8.** Dose-response curves of *P. verdolaga*'s AMPs against MDR *K. pneumoniae* (a) PvAMP7; (b) PvAMP32; (c) PvAMP66; (d) PvAMP69; (e) PvAMP82; (f) PvAMP164; (g) PvAMP172; (h) PvAMP177; (i) PvAMP183.



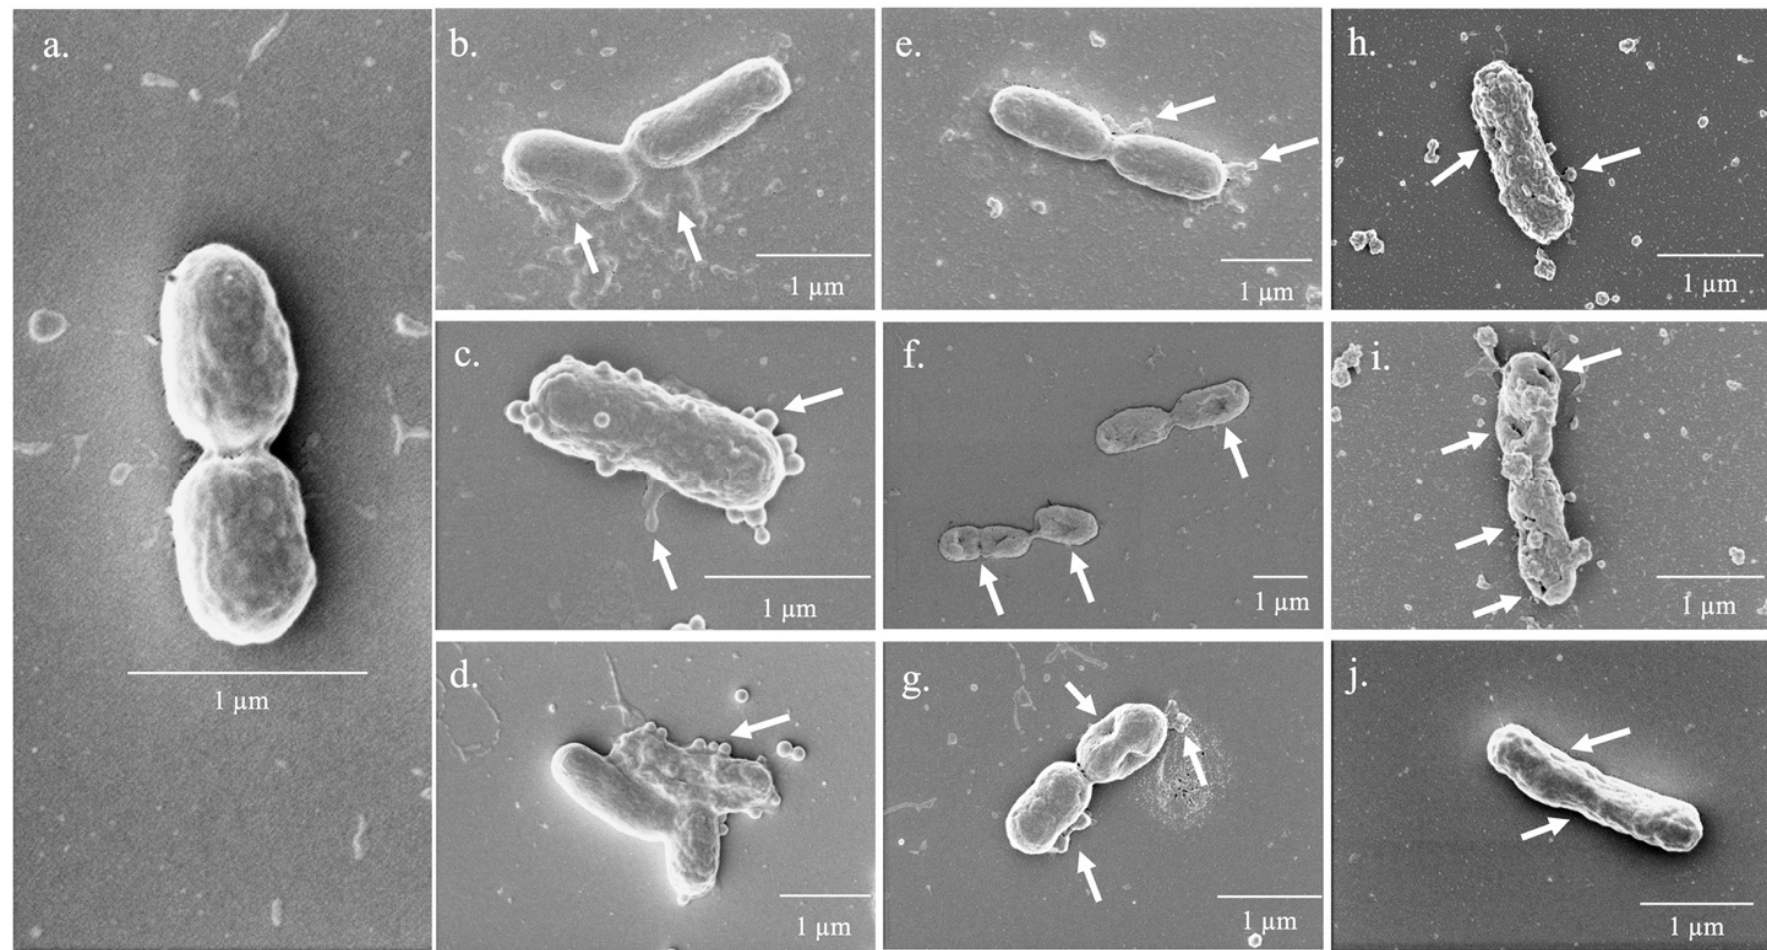

**Figure S9.** SEM analysis: (a) the multidrug resistant *K. pneumoniae* strain in media; and against (b) P7; (c) P32; (d) P66; (e) P69; (f) P82; (g) P164; (h) P172; (i) P177; (j) P183.

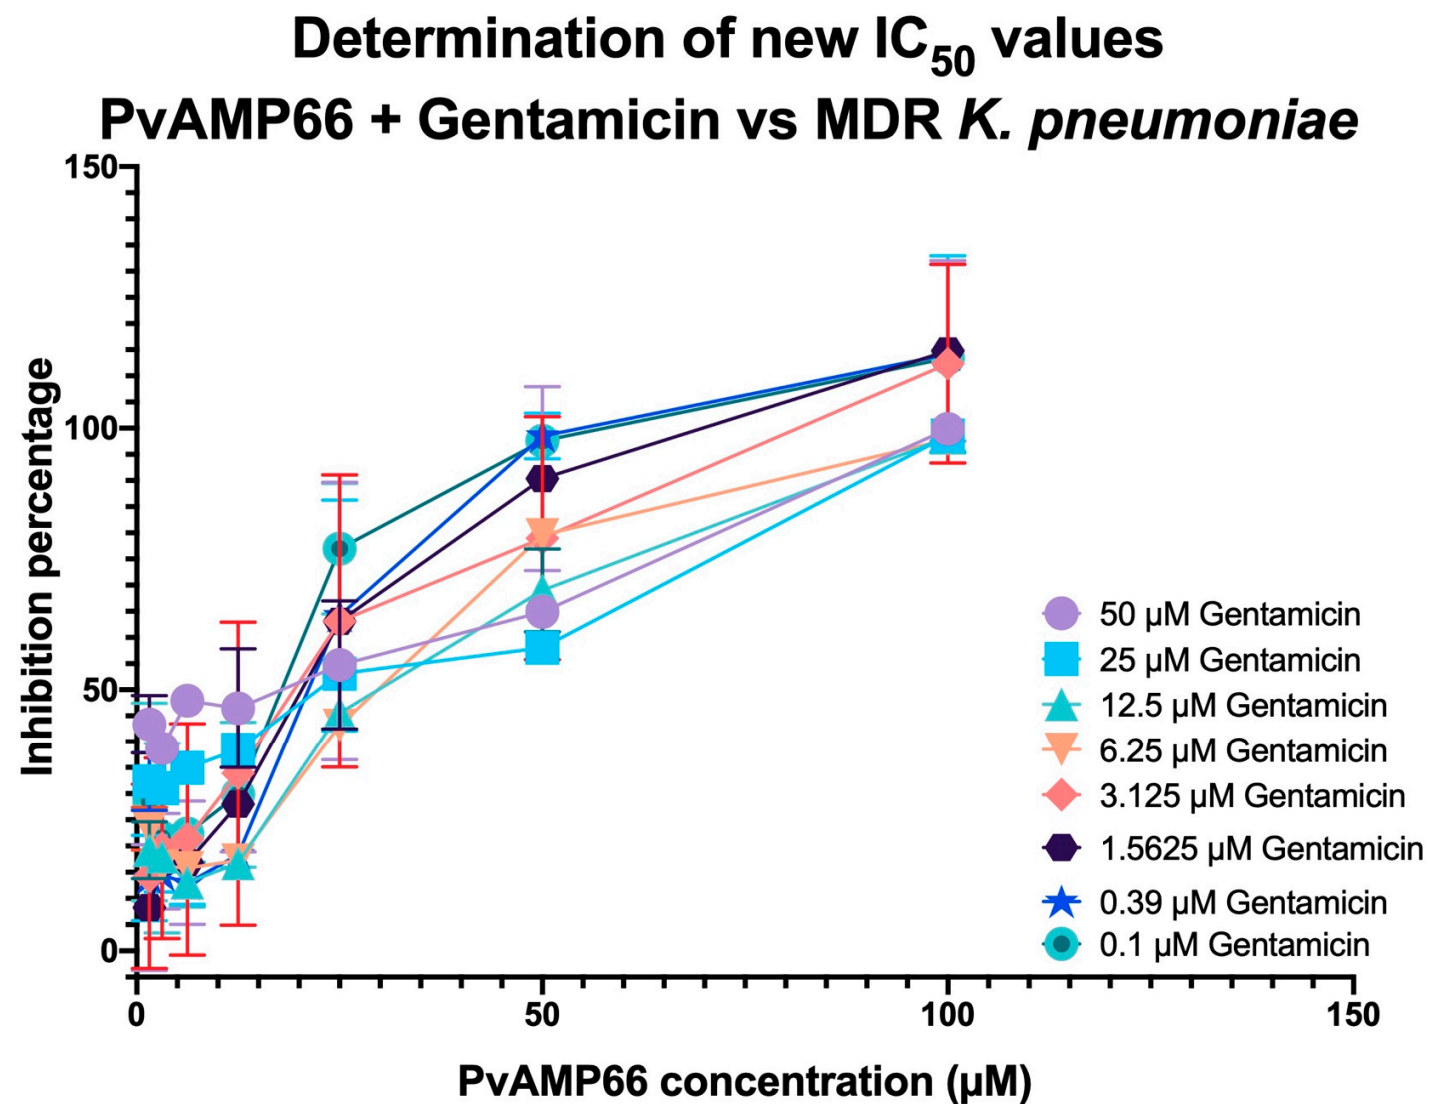

Figure S10. Dose-response curves of the isobologram analysis
